# Supplementary material for: Recent Progress in the Discovery and Development of Monoclonal Antibodies against Viral Infections
Source: MDPI journal article supplement (doi:10.3390/biomedicines10081861), 2022-08-02
Supplement: s1 [file s1]

**Table S1. Baltimore classification of viruses based on rare to pandemic diseases caused by viruses.**

| G  | type          | Genus, Family                         | host                      | Transmission           | Disease                        | Virus                       |
|----|---------------|---------------------------------------|---------------------------|------------------------|--------------------------------|-----------------------------|
| I  | dsDNA viruses |                                       |                           |                        |                                |                             |
|    |               | Lymphocryptovirus, Herpesviridae      | Human, monkeys            | Zoonosis, animal bite  | Encephalitis                   | Cercopithecine herpesvirus  |
|    |               | Lymphocryptovirus, Herpesviridae      | Human                     | Contact, saliva        | Mononucleosis                  | Epstein-Barr virus          |
|    |               | Orthohepadnavirus, Hepadnaviridae     | Human, Chimpanzees        | Sexual contact, blood  | Hepatitis                      | Hepatitis B virus           |
|    |               | Cytomegalovirus, Herpesviridae        | Human                     | Contact, urine, saliva | Mononucleosis, pneumonia       | Human cytomegalovirus       |
|    |               | Simplexvirus, Herpesviridae           | Human                     | Sexual contact, saliva | Skin lesions                   | Human herpesvirus 1         |
|    |               | Simplexvirus, Herpesviridae           | Human                     | Sexual contact, saliva | Skin lesions                   | Human herpesvirus 2         |
|    |               | Roseolovirus, Herpesviridae           | Human                     | Respiratory, contact   | Skin lesions                   | Human herpesvirus 6         |
|    |               | Roseolovirus, Herpesviridae           | Human                     | Respiratory, contact   | Skin lesions                   | Human herpesvirus 7         |
|    |               | Rhadinovirus, Herpesviridae           | Human                     | Sexual contact, saliva | Skin lymphoma                  | Human herpesvirus 8         |
|    |               | Mupapillomavirus, Papillomaviridae    | Human                     | Contact                | Skin warts                     | Human papillomavirus 1      |
|    |               | Alphapapillomavirus, Papillomaviridae | Human                     | Contact                | Skin warts                     | Human papillomavirus 2      |
|    |               | Alphapapillomavirus, Papillomaviridae | Human                     | Sexual                 | Genital warts, cervical cancer | Human papillomavirus 16,18  |
|    |               | Polyomavirus, Polyomaviridae          | Human                     | Fecal-oral or urine    | Encephalitis                   | JC polyomavirus             |
|    |               | Polyomavirus, Polyomaviridae          | Human                     | Fecal-oral or urine    | Encephalitis                   | KI Polyomavirus             |
|    |               | Polyomavirus, Polyomaviridae          | Human                     | -                      | Merkel cell carcinoma          | Merkel cell polyomavirus    |
|    |               | Molluscipoxvirus, Poxviridae          | Human                     | Contact                | Skin lesions                   | Molluscum contagiosum virus |
|    |               | Orthopoxvirus, Poxviridae             | Human, mouse, prairie dog | Zoonosis, contact      | Skin lesions                   | Monkeypox virus             |
|    |               | Parapoxvirus, Poxviridae              | Human, mammals            | Zoonosis, contact      | Skin lesions                   | Orf virus                   |
|    |               | Varicellovirus, Herpesviridae         | Human                     | Respiratory, contact   | Varicella                      | Varicella-zoster virus      |
|    |               | Orthopoxvirus, Poxviridae             | Human                     | Respiratory            | Variola                        | Variola virus               |
| II | ssDNA viruses |                                       |                           |                        |                                |                             |

|     |                                    |                                                  |                             |                                       |                                      |
|-----|------------------------------------|--------------------------------------------------|-----------------------------|---------------------------------------|--------------------------------------|
|     | Erythrovirus,<br>Parvoviridae      | Human                                            | Respiratory                 | Skin lesion                           | Human parvovirus B19                 |
| III | dsRNA<br>viruses                   |                                                  |                             |                                       |                                      |
|     | Seadornavirus,<br>Reoviridae       | Human, cattle,<br>pig, mosquitoes                | Zoonosis,<br>arthropod bite | Encephalitis                          | Banna virus                          |
|     | Rotavirus,<br>Reoviridae           | Human                                            | Fecal-oral                  | Gastroenteritis                       | Rotavirus A                          |
|     | Rotavirus,<br>Reoviridae           | Human                                            | Fecal-oral                  | Gastroenteritis                       | Rotavirus B                          |
|     | Rotavirus,<br>Reoviridae           | Human                                            | Fecal-oral                  | Gastroenteritis                       | Rotavirus C                          |
| IV  | (+)ssRNA<br>viruses                |                                                  |                             |                                       |                                      |
|     | Kobuvirus,<br>Picornaviridae       | Human                                            | Fecal-oral                  | Gastroenteritis                       | Aichi virus                          |
|     | Alphavirus,<br>Togaviridae         | Human,<br>marsupials,<br>mosquitoes              | Zoonosis,<br>arthropod bite | Fever, joint pain                     | Barmah forest virus                  |
|     | Alphavirus,<br>Togaviridae         | Human,<br>monkeys,<br>mosquitoes                 | Zoonosis,<br>arthropod bite | Fever, joint pain                     | Chikungunya virus                    |
|     | Enterovirus,<br>Picornaviridae     | Human                                            | Fecal-oral                  | Meningitis,<br>myocarditis, paralysis | Coxsackievirus                       |
|     | Flavivirus,<br>Flaviviridae        | Human,<br>mosquitoes                             | Zoonosis,<br>arthropod bite | Hemorrhagic fever                     | Dengue virus                         |
|     | Alphavirus,<br>Togaviridae         | Human, birds,<br>mosquitoes                      | Zoonosis,<br>arthropod bite | Encephalitis                          | Eastern equine<br>encephalitis virus |
|     | Enterovirus,<br>Picornaviridae     | Human                                            | Fecal-oral                  | Common cold                           | Echovirus                            |
|     | Cardiovirus,<br>Picornaviridae     | Human, mouse,<br>rat, pig                        | Zoonosis                    | Encephalitis                          | Encephalomyocarditis<br>virus        |
|     | Hepatovirus,<br>picornaviridae     | Human                                            | Fecal-oral                  | Hepatitis                             | Hepatitis A virus                    |
|     | Hepacivirus,<br>Flaviviridae       | Human                                            | Sexual, blood               | Hepatitis                             | Hepatitis C virus                    |
|     | Hepevirus,<br>Unassigned           | Human, pig,<br>monkeys, some<br>rodents, chicken | Zoonosis, food              | Hepatitis                             | Hepatitis E virus                    |
|     | Mamastrovirus,<br>Astroviridae     | Human                                            | Fecal-oral                  | Gastroenteritis                       | Human astrovirus                     |
|     | Alphacoronavirus,<br>Coronaviridae | Human                                            | Respiratory                 | Respiratory                           | Human coronavirus                    |
|     | Enterovirus,<br>Picornaviridae     | Human                                            | Fecal-oral                  | Diarrhea, neurological<br>disorder    | Human enterovirus 68,<br>70          |
|     | Enterovirus,<br>Picornaviridae     | Human                                            | Respiratory                 | Respiratory                           | Human rhinovirus                     |
|     | Betacoronavirus,<br>Coronaviridae  | Human, bats,<br>palm civet                       | Zoonosis                    | Respiratory                           | Human SARS<br>coronavirus            |

|   |                                   |                                       |                                      |                    |                                        |
|---|-----------------------------------|---------------------------------------|--------------------------------------|--------------------|----------------------------------------|
|   | Deltaretrovirus,<br>Retroviridae  | Human                                 | Sexual contact,<br>maternal-neonatal | Leukemia           | Human T-lymphotropic<br>virus          |
|   | Torovirus,<br>Coronaviridae       | Human                                 | Fecal-oral                           | Gastroenteritis    | Human torovirus                        |
|   | Flavivirus,<br>Flaviviridae       | Human, horses,<br>birds, mosquitoes   | Zoonosis,<br>arthropod borne         | Encephalitis       | Japanese encephalitis<br>virus         |
|   | Flavivirus,<br>Flaviviridae       | Human, horses,<br>birds, mosquitoes   | Zoonosis,<br>arthropod borne         | Encephalitis       | Kunjin virus                           |
|   | Flavivirus,<br>Flaviviridae       | Human, ticks                          | Zoonosis,<br>arthropod borne         | Encephalitis       | Langat virus                           |
|   | Norovirus,<br>Caliciviridae       | Human                                 | Fecal-oral                           | Gastroenteritis    | Lordsdale virus                        |
|   | Flavivirus,<br>Flaviviridae       | Human,<br>mammals, ticks              | Zoonosis,<br>arthropod bite          | Encephalitis       | Louping ill virus                      |
|   | Alphavirus,<br>Togaviridae        | Human,<br>mosquitoes                  | Zoonosis,<br>arthropod bite          | Fever, joint pain  | Mayaro virus                           |
|   | Betacoronavirus,<br>Coronaviridae | Human, Tomb<br>bat                    | Zoonosis                             | Respiratory        | MERS coronavirus                       |
|   | Morbilivirus,<br>Paramyxoviridae  | Human                                 | Respiratory                          | Fever, rash        | Measles virus                          |
|   | Cardiovirus,<br>Picornaviridae    | Human, mouse,<br>rabbit               | Zoonosis                             | Encephalitis       | Mengo<br>encephalomyocarditis<br>virus |
|   | Flavivirus,<br>Flaviviridae       | Human,<br>mosquitoes                  | Zoonosis,<br>arthropod bite          | Encephalitis       | Murray valley<br>encephalitis virus    |
|   | Norovirus,<br>Caliciviridae       | Human                                 | Fecal-oral                           | Gastroenteritis    | Norwalk virus                          |
|   | Alphavirus,<br>Togaviridae        | Human,<br>mosquitoes                  | Zoonosis,<br>arthropod bite          | Fever, joint pain  | O'nyong-nyong virus                    |
|   | Enterovirus,<br>Picornaviridae    | Human,<br>mammals                     | Fecal-oral                           | Poliomyelitis      | Poliovirus                             |
|   | Alphavirus,<br>Togaviridae        | Human,<br>mosquitoes,<br>marsupials   | Zoonosis,<br>arthropod bite          | Fever, joint pain  | Ross river virus                       |
|   | Rubivirus,<br>Togaviridae         | Human                                 | Respiratory                          | Rubella            | Rubella virus                          |
|   | Alphavirus,<br>Togaviridae        | Human, horse,<br>pig, mosquitoes      | Zoonosis,<br>arthropod bite          | Fever, joint pain  | Sagiyama virus                         |
|   | Salivirus,<br>Picornaviridae      | Human                                 |                                      | Gastroenteritis    | Salivirus A                            |
| V | (-)ssRNA<br>viruses               |                                       |                                      |                    |                                        |
|   | Lyssavirus,<br>Rhabdoviridae      | Human, bats                           | Zoonosis, animal<br>bite             | Fatal encephalitis | Australian bat lyssavirus              |
|   | Orthobunyavirus,<br>Bunyaviridae  | Human,<br>mosquitoes                  | Zoonosis,<br>arthropod bite          | Encephalitis       | Bunyamwera virus                       |
|   | Orthobunyavirus,<br>Bunyaviridae  | Human, deer,<br>mosquitoes,<br>tamias | Zoonosis,<br>arthropod bite          | Encephalitis       | Bunyavirus La Crosse                   |

|                                       |                                   |                                               |                                  |                                          |
|---------------------------------------|-----------------------------------|-----------------------------------------------|----------------------------------|------------------------------------------|
| Orthobunyavirus,<br>Bunyaviridae      | Human, rodents,<br>mosquitoes     | Zoonosis,<br>arthropod bite                   | Encephalitis                     | Bunyavirus snowshoe<br>hare              |
| Vesiculovirus,<br>Rhabdoviridae       | Human, sandflies                  | Zoonosis,<br>arthropod bite                   | Encephalitis                     | Chandipura virus                         |
| Nairovirus,<br>Bunyaviridae           | Human,<br>vertebrates, ticks      | Zoonosis,<br>arthropod bite                   | Hemorrhagic fever                | Crimean-Congo<br>hemorrhagic fever virus |
| Thogotovirus,<br>Orthomyxoviridae     | Human, ticks                      | Zoonosis,<br>arthropod bite                   | Fever, encephalitis              | Dhori virus                              |
| Nairovirus,<br>Bunyaviridae           | Human, ticks                      | Zoonosis,<br>arthropod bite                   | Thrombocytopaenia                | Dugbe virus                              |
| Lyssavirus,<br>Rhabdoviridae          | Human,<br>mammals                 | Zoonosis, animal<br>bite                      | Fatal encephalitis               | Duvenhage virus                          |
| Ebolavirus,<br>Filoviridae            | Human,<br>monkeys, bats           | Zoonosis, contact                             | Hemorrhagic fever                | Ebolavirus                               |
| Hantavirus,<br>Bunyaviridae           | Human, rodents                    | Zoonosis, urine,<br>saliva                    | Renal or respiratory<br>syndrome | Hantaan virus                            |
| Henipavirus,<br>paramyxoviridae       | Human, horse,<br>bats             | Zoonosis, animal<br>bite                      | Encephalitis                     | Hendra virus                             |
| Deltavirus,<br>Unassigned             | Human                             | Sexual contact,<br>blood                      | Hepatitis                        | Hepatitis delta virus                    |
| Respirovirus,<br>Paramyxoviridae      | Human                             | Respiratory                                   | Respiratory                      | Human parainfluenza                      |
| Orthopneumovirus,<br>Pneumoviridae    | Human                             | Respiratory                                   | Respiratory                      | Human respiratory<br>syncytial virus     |
| Influenzavirus A,<br>Orthomyxoviridae | Human, birds,<br>pigs             | Respiratory or<br>Zoonosis, animal<br>contact | Flu                              | Influenza A virus                        |
| Influenzavirus B,<br>Orthomyxoviridae | Human                             | Respiratory                                   | Flu                              | Influenza B virus                        |
| Influenzavirus C,<br>Orthomyxoviridae | Human                             | Respiratory                                   | Flu                              | Influenza C virus                        |
| Vesiculovirus,<br>Rhabdoviridae       | Human,<br>sandflies, gerbils      | Zoonosis,<br>arthropod bite                   | Undocumented,<br>encephalitis?   | Isfahan virus                            |
| Arenavirus,<br>Arenaviridae           | Human, rodents                    | Zoonosis, fomite                              | Hemorrhagic fever                | Junin arenavirus                         |
| Lyssavirus,<br>Rhabdoviridae          | Human,<br>mammals                 | Zoonosis, animal<br>bite                      | Fatal encephalitis               | Lagos bat virus                          |
| Marburgvirus,<br>Filoviridae          | Human,<br>monkeys, bats           | Zoonosis, fomite                              | Hemorrhagic fever                | Lake Victoria<br>marburgvirus            |
| Arenavirus,<br>Arenaviridae           | Human, rats                       | Zoonosis, fomites                             | Hemorrhagic fever                | Lassa virus                              |
| Arenavirus,<br>Arenaviridae           | Human, rodents                    | Zoonosis, fomite                              | Encephalitis                     | Lymphocytic<br>choriomeningitis virus    |
| Arenavirus,<br>Arenaviridae           | Human,<br>monkeys, mouse          | Zoonosis, fomite                              | Encephalitis                     | Machupo virus                            |
| Lyssavirus,<br>Rhabdoviridae          | Human, rodents,<br>cat, dog shrew | Zoonosis, animal<br>bite                      | Encephalitis                     | Mokola virus                             |
| Rubulavirus,<br>Paramyxoviridae       | Human                             | Respiratory,<br>saliva                        | Mumps                            | Mumps virus                              |

|     |                                  |                                                |                             |                    |                                 |
|-----|----------------------------------|------------------------------------------------|-----------------------------|--------------------|---------------------------------|
|     | Hantavirus,<br>Bunyavirus        | Human, mouse                                   | Zoonosis, urine,<br>saliva  | Hemorrhagic fever  | New York virus                  |
|     | Henipavirus,<br>Paramyxoviridae  | Human, bats                                    | Zoonosis, animal<br>bite    | Encephalitis       | Nipah virus                     |
|     | Orthobunyavirus,<br>Bunyaviridae | Human, wild<br>animals(sloths)                 | Zoonosis,<br>arthropod bite | Fever, joint pain  | Oropouche virus                 |
|     | Arenavirus,<br>Arenaviridae      | Human, rat,<br>guinea pig                      | Zoonosis, fomite            | Hemorrhagic fever  | Pichinde virus                  |
|     | Phlebovirus,<br>Bunyaviridae     | Human, sandflies                               | Zoonosis,<br>arthropod bite | Hemorrhagic fever  | Punta toro phlebovirus          |
|     | Hantavirus,<br>Bunyavirus        | Human, bank<br>vole                            | Zoonosis, urine,<br>saliva  | Hemorrhagic fever  | Puumala virus                   |
|     | Lyssavirus,<br>Rhabdoviridae     | Human,<br>mammals                              | Zoonosis, animal<br>bite    | Fatal encephalitis | Rabies virus                    |
|     | Phlebovirus,<br>Bunyaviridae     | Human,<br>mammals,<br>mosquitoes,<br>sandflies | Zoonosis,<br>arthropod bite | Hemorrhagic fever  | Rift valley fever virus         |
|     | Phlebovirus,<br>Bunyaviridae     | Human, sandflies                               | Zoonosis,<br>arthropod bite | Hemorrhagic fever  | Sandfly fever sicilian<br>virus |
|     | Hantavirus,<br>Bunyavirus        | Human, rats                                    | Zoonosis, urine,<br>saliva  | Hemorrhagic fever  | Seoul virus                     |
|     | Phlebovirus,<br>Bunyaviridae     | Human,<br>mosquitoes                           | Zoonosis,<br>arthropod bite | Hemorrhagic fever  | Toscana virus                   |
|     | Phlebovirus,<br>Bunyaviridae     | Human, ticks                                   | Zoonosis,<br>arthropod bite | Hemorrhagic fever  | Uukuniemi virus                 |
|     | Vesiculovirus,<br>Rhabdoviridae  | Human, cattle,<br>horse, pig, flies            | Zoonosis,<br>athropod bite  | Encephalitis       | Vesicular stomatitis virus      |
| VI  | ssRNA-RT<br>viruses              |                                                |                             |                    |                                 |
|     | Lentivirus,<br>Retroviridae      | Human                                          | Sexual contact,<br>blood    | AIDS               | Human<br>immunodeficiency virus |
| VII | dsDNA-RT<br>viruses              |                                                |                             |                    |                                 |

**Table S2. Mabs related to specific antigen in viral infections followed by clinical phase.**

| Row                                                                            | Status                   | Study Title                                                                                                                                                                                                                                                           | Conditions                              | Interventions<br>and target antigen                                                                                                                                                                                                              | Phase   |
|--------------------------------------------------------------------------------|--------------------------|-----------------------------------------------------------------------------------------------------------------------------------------------------------------------------------------------------------------------------------------------------------------------|-----------------------------------------|--------------------------------------------------------------------------------------------------------------------------------------------------------------------------------------------------------------------------------------------------|---------|
| <b>Zika virus</b> a member of <i>Flaviviridae</i> s (+ssRNA viruses-Group IV)  |                          |                                                                                                                                                                                                                                                                       |                                         |                                                                                                                                                                                                                                                  |         |
| 1                                                                              | Completed                | Safety and Tolerability of an Antibody Against Zika Virus (Tyzivumab) in Humans                                                                                                                                                                                       | Treatment of Acute Zika Virus Infection | <ul style="list-style-type: none"> <li>Drug: Tyzivumab</li> </ul> <p>ZIKV monoclonal antibody (mAb) surface-exposed envelope (E) protein of the virus</p>                                                                                        | Phase 1 |
| 2                                                                              | Recruiting               | Safety and Tolerability of an Antibody Against Zika Virus (Tyzivumab) in ZIKV Infected Patients                                                                                                                                                                       | Treatment of Acute Zika Virus Infection | <ul style="list-style-type: none"> <li>Biological: Tyzivumab</li> <li>Other: Placebo</li> </ul>                                                                                                                                                  | Phase 1 |
| <b>The human immunodeficiency viruses (HIV)</b> are a subgroup of Retroviridae |                          |                                                                                                                                                                                                                                                                       |                                         |                                                                                                                                                                                                                                                  |         |
| 1                                                                              | Completed                | The Safety and Effectiveness of Human Monoclonal Antibody, F105, in the Treatment of HIV                                                                                                                                                                              | HIV Infections                          | <ul style="list-style-type: none"> <li>Drug: F105 Monoclonal Antibody (Human) an anti-gp120</li> </ul>                                                                                                                                           | Phase 1 |
| 2                                                                              | Completed                | Safety and Virologic Effect of a Human Monoclonal Antibody (VRC01) Administered Intravenously to Adults During Early Acute HIV Infection                                                                                                                              | HIV Infections                          | <ul style="list-style-type: none"> <li>Biological: VRC01 (targeting specific B cell receptors)</li> <li>Biological: Placebo for VRC01</li> <li>Drug: Antiretroviral therapy (ART) (regimen will vary within countries and by patient)</li> </ul> | Phase 1 |
| 3                                                                              | Completed<br>Has Results | Evaluating the Safety, Tolerability, and Effect of a Human Monoclonal Antibody (VRC01) on Markers of HIV Persistence in HIV-Infected Adults Receiving Antiretroviral Therapy (ART)                                                                                    | HIV Infections                          | <ul style="list-style-type: none"> <li>Biological: VRC01 (targeting specific B cell receptors)</li> <li>Biological: Placebo</li> </ul>                                                                                                           | Phase 1 |
| 4                                                                              | Active, not recruiting   | Evaluating the Safety, Tolerability, Pharmacokinetics, and Antiviral Activity of the Monoclonal Antibody PGT121.414.LS Administered Alone and in Combination With VRC07-523LS Via Intravenous or Subcutaneous Infusions in Healthy, HIV-uninfected Adult Participants | HIV Infections                          | <ul style="list-style-type: none"> <li>Biological: PGT121.414.LS targeting V3-glycan</li> <li>Biological: VRC07-523LS(targeting specific B cell receptors CD4 binding site)</li> </ul>                                                           | Phase 1 |
| 5                                                                              | Completed                | Safety, PK and Antiviral Activity of PGT121 Monoclonal Antibody in HIV-uninfected and HIV-infected Adults                                                                                                                                                             | HIV Infection                           | <ul style="list-style-type: none"> <li>Biological: PGT121 3mg/kg IV</li> <li>Biological: PGT121 10mg/kg IV</li> <li>Biological: PGT121 30mg/kg IV (targeting V3-glycan)</li> <li>(and 2 more...)</li> </ul>                                      | Phase 1 |
| 6                                                                              | Completed                | Evaluating the Safety and Serum Concentrations of a Human Monoclonal Antibody, VRC-HIVMAB075-00-AB                                                                                                                                                                    | HIV Infections                          | <ul style="list-style-type: none"> <li>Biological: VRC07-523LS(targeting specific B cell receptors CD4 binding site)</li> </ul>                                                                                                                  | Phase 1 |

(VRC07-523LS), Administered in Multiple Doses and Routes to Healthy, HIV-uninfected Adults

- Biological: Placebo

|    |                          |                                                                                                                                                                                                                                                       |                |                                                                                                                                                                                                                                                                                                                        |                    |
|----|--------------------------|-------------------------------------------------------------------------------------------------------------------------------------------------------------------------------------------------------------------------------------------------------|----------------|------------------------------------------------------------------------------------------------------------------------------------------------------------------------------------------------------------------------------------------------------------------------------------------------------------------------|--------------------|
| 7  | Completed                | Evaluating the Safety, Tolerability, Pharmacokinetics, and Antiviral Activity of Combinations of Monoclonal Antibodies PGT121, PGDM1400, 10-1074, and VRC07-523LS Administered Via Intravenous Infusion in Healthy, HIV-uninfected Adult Participants | HIV Infections | <ul style="list-style-type: none"> <li>• Biological: PGT121(targeting V3-glycan)</li> <li>• Biological: PGDM1400 (targeting V1-V2 glycan)</li> <li>• Biological: 10-1074(targeting V3-glycan)</li> <li>• Biological: VRC07-523LS(<b>targeting specific B cell receptors CD4 binding site</b>)</li> </ul>               | Phase 1            |
| 8  | Completed<br>Has Results | Evaluating the Safety and Pharmacokinetics of VRC01, VRC01LS, and VRC07-523LS, Potent Anti-HIV Neutralizing Monoclonal Antibodies, in HIV-1-Exposed Infants                                                                                           | HIV Infections | <ul style="list-style-type: none"> <li>• Biological: VRC01</li> <li>• Biological: VRC01LS</li> <li>• Biological: VRC07-523LS</li> </ul> <p>(<b>targeting specific B cell receptors CD4 binding site</b>)</p>                                                                                                           | Phase 1            |
| 9  | Completed                | Phase I/II, Open-Label Trial of Three Monoclonal Antibodies                                                                                                                                                                                           | HIV Infections | <ul style="list-style-type: none"> <li>• Drug: Potent HAART during acute or early HIV-1 infection</li> </ul> <p>combination of two nucleoside reverse transcriptase inhibitors (typically tenofovir-emtricitabine) plus one non-nucleoside reverse transcriptase inhibitor or integrase strand transfer inhibitor.</p> | Phase 1<br>Phase 2 |
| 10 | Completed                | A Study of Anti-HIV Monoclonal Antibody KD-247                                                                                                                                                                                                        | HIV Infections | <ul style="list-style-type: none"> <li>• Drug: KD-247 (targeting V3-glycan)</li> <li>• Drug: Physiological saline</li> </ul>                                                                                                                                                                                           | Phase 1            |
| 11 | Completed<br>Has Results | Safety and Therapeutic Efficacy of the VRC01 Antibody in Patients Who Initiated Antiretroviral Therapy During Early Acute HIV Infection                                                                                                               | HIV Infections | <ul style="list-style-type: none"> <li>• Biological: VRC01 (<b>targeting specific B cell receptors CD4 binding site</b>)</li> <li>• Biological: Placebo for VRC01</li> </ul>                                                                                                                                           | Phase 2            |
| 12 | Completed                | A Clinical Trial of PGDM1400 and PGT121 and VRC07-523LS Monoclonal Antibodies in HIV-infected and HIV-uninfected Adults                                                                                                                               | HIV Infections | <ul style="list-style-type: none"> <li>• Biological: PGDM1400/Placebo (3mg/kg IV)</li> <li>• Biological: PGDM1400/Placebo (10mg/kg IV)</li> <li>• Biological: PGDM1400/Placebo (30mg/kg IV)</li> <li>• (and 5 more...)</li> </ul> <p>(targeting V1-V2 glycan)</p>                                                      | Phase 1            |
| 13 | Completed                | Evaluating the Safety and Antiviral Activity of Monoclonal Antibody VRC01 in HIV-Infected Infants Receiving Combination Antiretroviral Therapy                                                                                                        | HIV Infections | <ul style="list-style-type: none"> <li>• Biological: VRC01 (<b>targeting specific B cell receptors CD4 binding site</b>)</li> <li>• Drug: Combination Antiretroviral Therapy (cART)</li> </ul>                                                                                                                         | Phase 1<br>Phase 2 |
| 14 | Completed                | Evaluating the Safety and Efficacy of the VRC01 Antibody                                                                                                                                                                                              | HIV Infections | <ul style="list-style-type: none"> <li>• Biological: VRC01</li> </ul>                                                                                                                                                                                                                                                  | Phase 2            |

|    |                          |                                                                                                                                                                                                                                                        |                                                                                                                  |                                                                                                                                                                                                                                                                                                                  |                    |
|----|--------------------------|--------------------------------------------------------------------------------------------------------------------------------------------------------------------------------------------------------------------------------------------------------|------------------------------------------------------------------------------------------------------------------|------------------------------------------------------------------------------------------------------------------------------------------------------------------------------------------------------------------------------------------------------------------------------------------------------------------|--------------------|
|    |                          | in Reducing Acquisition of HIV-1 Infection in Women                                                                                                                                                                                                    |                                                                                                                  | <ul style="list-style-type: none"> <li>Biological: Placebo for VRC01</li> </ul>                                                                                                                                                                                                                                  |                    |
|    |                          |                                                                                                                                                                                                                                                        |                                                                                                                  | (targeting specific B cell receptors CD4 binding site)                                                                                                                                                                                                                                                           |                    |
| 15 | Completed                | Evaluating the Safety and Efficacy of the VRC01 Antibody in Reducing Acquisition of HIV-1 Infection Among Men and Transgender Persons Who Have Sex With Men                                                                                            | HIV Infections                                                                                                   | <ul style="list-style-type: none"> <li>Biological: VRC01</li> <li>Biological: Placebo for VRC01</li> </ul>                                                                                                                                                                                                       | Phase 2            |
|    |                          |                                                                                                                                                                                                                                                        |                                                                                                                  | (targeting specific B cell receptors CD4 binding site)                                                                                                                                                                                                                                                           |                    |
| 16 | Completed<br>Has Results | Evaluating the Safety, Pharmacokinetics, and Antiviral Activity of a Human Monoclonal Antibody (VRC01) in HIV-Infected Adults Undergoing a Brief Treatment Interruption                                                                                | HIV Infections                                                                                                   | <ul style="list-style-type: none"> <li>Biological: VRC01</li> </ul>                                                                                                                                                                                                                                              | Phase 1            |
|    |                          |                                                                                                                                                                                                                                                        |                                                                                                                  | (targeting specific B cell receptors CD4 binding site)                                                                                                                                                                                                                                                           |                    |
| 17 | Completed                | A Phase I/II Trial to Assess the Safety and Tolerance of Escalating Doses of a Human Anti-Cytomegalovirus Monoclonal Antibody (SDZ MSL-109) in Patients With the Acquired Immunodeficiency Syndrome and CMV Retinitis                                  | Cytomegalovirus Retinitis<br><br>HIV Infections                                                                  | <ul style="list-style-type: none"> <li>Drug: Sevirumab</li> </ul>                                                                                                                                                                                                                                                | Phase 1            |
|    |                          |                                                                                                                                                                                                                                                        |                                                                                                                  | Anti-Cytomegalovirus                                                                                                                                                                                                                                                                                             |                    |
| 18 | Recruiting               | A Phase 1/2a Study of PGT121, VRC07-523LS and PGDM1400 Monoclonal Antibodies in HIV-uninfected and HIV-infected Adults                                                                                                                                 | HIV/AIDS                                                                                                         | <ul style="list-style-type: none"> <li>Biological: PGT121 + VRC07-523LS (targeting V3glycan+targeting specific B cell receptors CD4 binding site)</li> <li>Biological: PGT121 + VRC07-523LS + PGDM1400 (targeting V3glycan+targeting specific B cell receptors CD4 binding site+targeting V1-2glycan)</li> </ul> | Phase 1<br>Phase 2 |
| 19 | Completed                | Safety and Pharmacokinetics of a Human Monoclonal Antibody, VRC-HIVMAB080-00-AB (VRC01LS), With Broad HIV-1 Neutralizing Activity, Administered Intravenously or Subcutaneously to Healthy Adults                                                      | Prevention of HIV Infection<br><br>HIV Antibodies<br><br>Monoclonal Antibody, Human<br><br>Neutralizing Antibody | <ul style="list-style-type: none"> <li>Biological: VRC-HIVMAB080-00-AB (VRC01LS)</li> <li>Biological: VRC-HIVMAB060-00-AB (VRC01)</li> </ul>                                                                                                                                                                     | Phase 1            |
|    |                          |                                                                                                                                                                                                                                                        |                                                                                                                  | (targeting specific B cell receptors CD4 binding site)                                                                                                                                                                                                                                                           |                    |
| 20 | Completed                | A Randomized, Phase I/II Trial to Assess the Safety and Antiviral Effects of Escalating Doses of A Human Anti-Cytomegalovirus Monoclonal Antibody (SDZ MSL-109) in Patients With the Acquired Immunodeficiency Syndrome and CMV Viremia and/or Viruria | Cytomegalovirus Infections<br><br>HIV Infections                                                                 | <ul style="list-style-type: none"> <li>Drug: Sevirumab Anti-Cytomegalovirus Monoclonal Antibody (SDZ MSL-109)</li> </ul>                                                                                                                                                                                         | Phase 1            |
| 21 | Unknown<br>↑             | Study of Single IV Administration of P2G12                                                                                                                                                                                                             | HIV Infection                                                                                                    | <ul style="list-style-type: none"> <li>Drug: P2G12 Dose Cohort 1</li> <li>Drug: P2G12 Dose Cohort 2</li> </ul>                                                                                                                                                                                                   | Phase 1            |

|    |                          |                                                                                                                                                                                     |                                                                                              |                                                                                                                                                                                                                                                                                |                    |
|----|--------------------------|-------------------------------------------------------------------------------------------------------------------------------------------------------------------------------------|----------------------------------------------------------------------------------------------|--------------------------------------------------------------------------------------------------------------------------------------------------------------------------------------------------------------------------------------------------------------------------------|--------------------|
|    |                          |                                                                                                                                                                                     |                                                                                              | <ul style="list-style-type: none"> <li>Drug: P2G12 Dose Cohort 3</li> </ul>                                                                                                                                                                                                    |                    |
|    |                          |                                                                                                                                                                                     |                                                                                              | Targeting gp41- MPER                                                                                                                                                                                                                                                           |                    |
| 22 | Recruiting               | PET Imaging of Radiolabeled Anti-HIV-1 Envelope Monoclonal Antibody (VRC01)                                                                                                         | HIV-1-infection                                                                              | <ul style="list-style-type: none"> <li>Drug: [89]Zr-DFO-VRC-HIVMAB060-00-AB</li> </ul>                                                                                                                                                                                         | Phase 1            |
|    |                          |                                                                                                                                                                                     |                                                                                              | (targeting specific B cell receptors CD4 binding site)                                                                                                                                                                                                                         |                    |
| 23 | Completed                | Vaginal Antibody Safety Trial: Safety Study of Monoclonal Antibodies to Reduce the Vaginal Transmission of Herpes Simplex Virus (HSV) and Human Immunodeficiency Virus (HIV)        | HIV<br><br>Herpes Simplex Infections                                                         | <ul style="list-style-type: none"> <li>Drug: MB66</li> </ul> <p>a multipurpose prevention technology (MPT) product with monoclonal antibodies (mAbs) against HIV-1 (VRC01-N) and HSV-1 and 2 (HSV8-N)</p> <ul style="list-style-type: none"> <li>Drug: Placebo Film</li> </ul> | Phase 1            |
| 24 | Completed                | Evaluating the Safety and Drug Levels of an Antibody Against HIV in Healthy, HIV-Uninfected Adults                                                                                  | HIV Infections                                                                               | <ul style="list-style-type: none"> <li>Biological: VRC01</li> <li>Biological: SC placebo for VRC01</li> <li>Biological: IV placebo for VRC01</li> </ul>                                                                                                                        | Phase 1            |
|    |                          |                                                                                                                                                                                     |                                                                                              | (targeting specific B cell receptors CD4 binding site)                                                                                                                                                                                                                         |                    |
| 25 | Completed                | Study of the Safety and Pharmacokinetics of a Human Monoclonal Antibody, VRC-HIVMAB060-00-AB (VRC01), Administered Intravenously or Subcutaneously to Healthy Adults                | HIV Infection<br><br>Monoclonal Antibody, Human<br><br>HIV Antibodies<br><br>(and 2 more...) | <ul style="list-style-type: none"> <li>Drug: VRC-HIVMAB060-00-AB</li> </ul>                                                                                                                                                                                                    | Phase 1            |
|    |                          |                                                                                                                                                                                     |                                                                                              | (targeting specific B cell receptors CD4 binding site)                                                                                                                                                                                                                         |                    |
| 26 | Completed<br>Has Results | Studies of the Ocular Complications of AIDS (SOCA)-Monoclonal Antibody CMV Retinitis Trial (MACRT)                                                                                  | HIV Infections<br><br>Cytomegalovirus Retinitis                                              | <ul style="list-style-type: none"> <li>Drug: MSL-109 Anti CMV</li> <li>Other: Placebo</li> </ul>                                                                                                                                                                               | Phase 2<br>Phase 3 |
| 27 | Active, not recruiting   | 3BNC117-LS and 10-1074-LS in Viremic HIV-infected Individuals                                                                                                                       | Human Immunodeficiency Virus                                                                 | <ul style="list-style-type: none"> <li>Drug: 3BNC117-LS (targeting specific B cell receptors CD4 binding site)</li> <li>Drug: 10-1074-LS (targeting V3glycan)</li> </ul>                                                                                                       | Phase 1            |
| 28 | Completed                | Safety and Tolerability of PRO 140 in HIV Uninfected Male Volunteers                                                                                                                | HIV Infections                                                                               | <ul style="list-style-type: none"> <li>Drug: PRO 140 anti-CCR5 monoclonal antibody</li> </ul>                                                                                                                                                                                  | Phase 1            |
| 29 | Completed                | A Phase II/III Trial of Human Anti-CMV Monoclonal Antibody MSL 109 (MACRT)                                                                                                          | Cytomegalovirus Retinitis<br><br>HIV Infections                                              | <ul style="list-style-type: none"> <li>Drug: Sevimumab Anti-CMV Monoclonal</li> </ul>                                                                                                                                                                                          | Phase 2            |
| 30 | Completed                | VRC 601: A Phase I, Open-Label, Dose-Escalation Study of the Safety and Pharmacokinetics of a Human Monoclonal Antibody, VRC HIVMAB060-00-AB (VRC01), With Broad HIV-1 Neutralizing | HIV-1 Infection<br><br>Neutralizing Antibody<br><br>Monoclonal Antibody                      | <ul style="list-style-type: none"> <li>Biological: VRC-HIVMAB060-00-AB (targeting specific B cell receptors CD4 binding site)</li> </ul>                                                                                                                                       | Phase 1            |

Activity, Administered Intravenously or Subcutaneously to HIV-Infected... (and 2 more...)

|    |                          |                                                                                                                                                                        |                              |                                                                                                                                                                                                                                                                                             |         |
|----|--------------------------|------------------------------------------------------------------------------------------------------------------------------------------------------------------------|------------------------------|---------------------------------------------------------------------------------------------------------------------------------------------------------------------------------------------------------------------------------------------------------------------------------------------|---------|
| 31 | Completed                | 3BNC117 and 10-1074 in HIV Uninfected Adults                                                                                                                           | Human Immunodeficiency Virus | <ul style="list-style-type: none"> <li>Drug: 3BNC117 (targeting specific B cell receptors CD4 binding site)</li> <li>Drug: 10-1074 (targeting V3glycan)</li> <li>Drug: Placebo</li> </ul>                                                                                                   | Phase 1 |
| 32 | Completed<br>Has Results | Dose-Response Study of Ibalizumab (Monoclonal Antibody) Plus Optimized Background Regimen in Patients With HIV-1                                                       | HIV                          | <ul style="list-style-type: none"> <li>Drug: Ibalizumab (targeting CD4 receptors)</li> </ul>                                                                                                                                                                                                | Phase 2 |
| 33 | Recruiting               | A Study to Evaluate the Antiviral Effect, Safety and Tolerability of GSK3810109A in Viremic Human Immunodeficiency Virus (HIV)-1 Infected Adults                       | HIV Infections               | <ul style="list-style-type: none"> <li>Biological: GSK3810109A<br/>an HIV-1 Specific Broadly Neutralizing Human Monoclonal Antibody</li> </ul>                                                                                                                                              | Phase 2 |
| 34 | Completed<br>Has Results | Vedolizumab (Anti-alpha4beta7) in Subjects With HIV Infection Undergoing Analytical Treatment Interruption                                                             | HIV                          | <ul style="list-style-type: none"> <li>Biological: Entyvio (Vedolizumab) targeting alpha4beta7</li> </ul>                                                                                                                                                                                   | Phase 1 |
| 35 | Unknown<br>†             | TNX-355 With Optimized Background Therapy (OBT) in Treatment-Experienced Subjects With HIV-1                                                                           | HIV Infections               | <ul style="list-style-type: none"> <li>Drug: TNX-355 (anti CD-4)</li> </ul>                                                                                                                                                                                                                 | Phase 2 |
| 36 | Completed<br>Has Results | Phase 1, Open-label, Single Dose Study to Examine Safety, Tolerability, Pharmacokinetics and Virologic Impact of VRC01LS or VRC07-523LS in HIV-infected Viremic Adults | HIV-1                        | <ul style="list-style-type: none"> <li>Biological: VRC-HIVMAB080-00-AB</li> <li>Biological: VRC-HIVMAB075-00-AB</li> </ul> <p>(targeting specific B cell receptors CD4 binding site)</p>                                                                                                    | Phase 1 |
| 37 | Not yet recruiting       | VRC 611: Human Monoclonal Antibody (mAb) VRC-HIVMAB0102-00-AB (CAP256V2LS) Administered Via Subcutaneous and Intravenous Injection in Healthy Adults                   | HIV                          | <ul style="list-style-type: none"> <li>Biological: VRC-HIVMAB0102-00-AB</li> </ul> <p>(targeting specific B cell receptors CD4 binding site)</p>                                                                                                                                            | Phase 1 |
| 38 | Completed                | A Study of the Safety, Pharmacokinetics and Antiretroviral Activity of 10-1074                                                                                         | Healthy<br><br>HIV           | <ul style="list-style-type: none"> <li>Biological: 3 mg/kg, single dose IV administration of 10-1074</li> <li>Biological: 10 mg/kg, single dose IV administration of 10-1074</li> <li>Biological: 30 mg/kg, single dose IV administration of 10-1074</li> </ul> <p>(targeting V3glycan)</p> | Phase 1 |

|    |                          |                                                                                                                                                                                                                                                               |                                                                          |                                                                                                                                                                            |                    |
|----|--------------------------|---------------------------------------------------------------------------------------------------------------------------------------------------------------------------------------------------------------------------------------------------------------|--------------------------------------------------------------------------|----------------------------------------------------------------------------------------------------------------------------------------------------------------------------|--------------------|
| 39 | Completed                | DCVax Plus Poly ICLC in Healthy Volunteers                                                                                                                                                                                                                    | HIV-1 Infection<br><br>HIV Infection<br><br>Healthy Volunteers           | <ul style="list-style-type: none"> <li>Drug: DCVax-001 anti CD205</li> <li>Drug: Poly-ICLC</li> <li>Drug: Placebo</li> </ul>                                               | Phase 1            |
| 40 | Completed<br>Has Results | Study of PRO 140 by Subcutaneous Administration in Adult Subjects With HIV -1 Infection                                                                                                                                                                       | HIV -1 Infection<br><br>HIV Infections                                   | <ul style="list-style-type: none"> <li>Drug: PRO 140 (humanized monoclonal antibody to CCR5)</li> <li>Drug: Placebo Comparator</li> </ul>                                  | Phase 2            |
| 41 | Completed<br>Has Results | 3BNC117 Monoclonal Antibody in HIV-infected Subjects During Treatment Interruption                                                                                                                                                                            | HIV-1 Infection                                                          | <ul style="list-style-type: none"> <li>Drug: 3BNC117(targeting specific B cell receptors CD4 binding site)</li> <li>Other: ART Interruption</li> </ul>                     | Phase 2            |
| 42 | Completed<br>Has Results | Study of Simtuzumab in HIV and/or Hepatitis C- Infected Adults With Liver Fibrosis                                                                                                                                                                            | Liver Fibrosis<br><br>Hepatitis C<br><br>HIV<br><br>HIV/HCV Co-infection | <ul style="list-style-type: none"> <li>Biological: Simtuzumab targeting lysyl oxidase-like 2 (LOXL2)</li> </ul>                                                            | Phase 2            |
| 43 | Recruiting               | VRC 609 Study: A Phase I, Open-Label, Dose-Escalation Study of the Safety and Pharmacokinetics of a Human Monoclonal Antibody, VRC-HIVMAB091-00-AB (N6LS), Administered Intravenously or Subcutaneously With or Without Recombinant Human Hyaluronidase PH... | HIV Antibodies                                                           | <ul style="list-style-type: none"> <li>Biological: VRC-HIVMAB091-00-AB (targeting specific B cell receptors CD4 binding site)</li> <li>Biological: EDP</li> </ul>          | Phase 1            |
| 44 | Completed<br>Has Results | VRC 605: Safety and Pharmacokinetics of a Human Monoclonal Antibody, VRC-HIVMAB075-00-AB (VRC07-523LS), Administered Intravenously or Subcutaneously to Healthy Adults                                                                                        | HIV Prevention                                                           | <ul style="list-style-type: none"> <li>Biological: VRC-HIVMAB075-00-AB (targeting specific B cell receptors CD4 binding site)</li> </ul>                                   | Phase 1            |
| 45 | Completed                | A Randomized, Double-blind, Placebo-controlled Trial, Followed by Single-arm Treatment of PRO 140 in Combination w/ Optimized Background Therapy in Treatment-Experienced HIV Subjects                                                                        | HIV                                                                      | <ul style="list-style-type: none"> <li>Drug: PRO 140 (humanized monoclonal antibody to CCR5)</li> <li>Drug: Placebo</li> <li>Drug: Optimized Background Regimen</li> </ul> | Phase 2<br>Phase 3 |
| 46 | Completed                | 3BNC117-LS First-in-Human Phase 1 Study                                                                                                                                                                                                                       | Human Immunodeficiency Virus                                             | <ul style="list-style-type: none"> <li>Drug: 3BNC117-LS (targeting specific B cell receptors CD4 binding site)</li> <li>Drug: Placebo</li> </ul>                           | Phase 1            |
| 47 | Completed                | Bavituximab Repeat-Dose Trial in Patients Co-Infected With Chronic Hepatitis C Virus and                                                                                                                                                                      | Hepatitis C Virus<br><br>Hiv Infections                                  | <ul style="list-style-type: none"> <li>Drug: bavituximab targeting phosphatidylserine (PS)</li> </ul>                                                                      | Phase 1            |

Human Immunodeficiency  
Virus

|    |                        |                                                                                                                                                       |                              |                                                                                                                                                                                                                                                                                                       |         |
|----|------------------------|-------------------------------------------------------------------------------------------------------------------------------------------------------|------------------------------|-------------------------------------------------------------------------------------------------------------------------------------------------------------------------------------------------------------------------------------------------------------------------------------------------------|---------|
| 48 | Withdrawn              | PRO 140 for Human Immunodeficiency Virus Infection                                                                                                    | HIV                          | <ul style="list-style-type: none"> <li>Biological: PRO 140 (humanized monoclonal antibody to CCR5)</li> </ul>                                                                                                                                                                                         | Phase 2 |
| 49 | Recruiting             | 10E8.4/iMab Bispecific Antibody in HIV-uninfected and HIV-infected Adults                                                                             | HIV-1-infection              | <ul style="list-style-type: none"> <li>Biological: 10E8.4/iMab targeting gp41 MPER</li> </ul>                                                                                                                                                                                                         | Phase 1 |
| 50 | Active, not recruiting | 3BNC117 and 10-1074 in ART-treated Individuals                                                                                                        | Human Immunodeficiency Virus | <ul style="list-style-type: none"> <li>Drug: 3BNC117 LS (targeting specific B cell receptors CD4 binding site)</li> <li>Drug: 10-1074 targeting V3 glycan</li> <li>Other: Analytical treatment interruption</li> </ul>                                                                                | Phase 1 |
| 51 | Completed              | Investigator-Sponsored Protocol - Continued Use of Ibalizumab                                                                                         | HIV Infections               | <ul style="list-style-type: none"> <li>Drug: ibalizumab 800mg Q2Weeks</li> <li>Drug: ibalizumab 2000mg Q4Weeks</li> </ul> <p>Targeting CD4 receptors</p>                                                                                                                                              | Phase 2 |
| 52 | Completed              | Evaluating the Safety and Pharmacokinetics of VRC-HIVMAB075-00-AB (VRC07-523LS) in the Sera and Mucosae of Healthy, HIV-Uninfected Adult Participants | HIV Infections               | <ul style="list-style-type: none"> <li>Biological: VRC07-523LS (targeting specific B cell receptors CD4 binding site)</li> </ul>                                                                                                                                                                      | Phase 1 |
| 53 | Completed Has Results  | Ibalizumab Plus Optimized Background Regimen in Treatment-Experienced Patients With Multi-Drug Resistant HIV-1                                        | HIV                          | <ul style="list-style-type: none"> <li>Drug: ibalizumab Targeting CD4 receptors</li> <li>Drug: Optimized Background Regimen</li> </ul>                                                                                                                                                                | Phase 3 |
| 54 | Completed              | A Phase I Study to Evaluate the Safety and Immunogenicity of Heterologous Boost Immunizations With MVA-CMDR                                           | HIV                          | <ul style="list-style-type: none"> <li>Biological: MVA-CMDR expressing <i>env</i> and <i>gag-pol</i> genes</li> </ul>                                                                                                                                                                                 | Phase 1 |
| 55 | Recruiting             | Long-Acting Cabotegravir Plus VRC-HIVMAB075-00-AB (VRC07-523LS) for Viral Suppression in Adults Living With HIV-1                                     | HIV Infections               | <ul style="list-style-type: none"> <li>Drug: Oral Cabotegravir (CAB)</li> <li>Drug: Nucleoside Reverse Transcriptase Inhibitors (NRTIs)</li> <li>Drug: Long-Acting Injectable Cabotegravir (CAB LA)</li> <li>(and 2 more...)</li> </ul> <p>(targeting specific B cell receptors CD4 binding site)</p> | Phase 2 |
| 56 | Not yet recruiting     | Study for Evaluation of the Safety, Pharmacokinetics, and Antiviral Activity of UB-421 Subcutaneous Formulation in HIV Infected Adults                | HIV-1-infection              | <ul style="list-style-type: none"> <li>Biological: UB-421 SC targeting CD4 receptor on T-cells</li> </ul>                                                                                                                                                                                             | Phase 1 |

|    |                          |                                                                                                                                                           |                                        |                                                                                                                                                                                                                                                                                                                                                       |         |
|----|--------------------------|-----------------------------------------------------------------------------------------------------------------------------------------------------------|----------------------------------------|-------------------------------------------------------------------------------------------------------------------------------------------------------------------------------------------------------------------------------------------------------------------------------------------------------------------------------------------------------|---------|
| 57 | Completed                | Romidepsin Plus 3BNC117 Phase 2a Study                                                                                                                    | Human Immunodeficiency Virus (HIV)     | <ul style="list-style-type: none"> <li>Drug: 3BNC117 (targeting specific B cell receptors CD4 binding site)</li> <li>Drug: Romidepsin</li> </ul>                                                                                                                                                                                                      | Phase 2 |
| 58 | Completed<br>Has Results | VRC-HIVMAB060-00-AB (VRC01) in People With Chronic HIV Infection Undergoing Analytical Treatment Interruption                                             | HIV                                    | <ul style="list-style-type: none"> <li>Biological: VRC-HIVMAB060-00-AB (VRC01) (targeting specific B cell receptors CD4 binding site)</li> </ul>                                                                                                                                                                                                      | Phase 1 |
| 59 | Completed                | 3BNC117 and 10-1074 in HIV-infected Individuals                                                                                                           | Human Immunodeficiency Virus (HIV)     | <ul style="list-style-type: none"> <li>Drug: 3BNC117 (targeting specific B cell receptors CD4 binding site)</li> <li>Drug: 10-1074 targeting V3 glycan</li> <li>Other: Analytical treatment interruption</li> <li>Drug: Placebo</li> </ul>                                                                                                            | Phase 1 |
| 60 | Completed                | First-in-human Study of 10-1074-LS Alone and in Combination With 3BNC117-LS                                                                               | Human Immunodeficiency Virus           | <ul style="list-style-type: none"> <li>Drug: 10-1074-LS targeting V3 glycan</li> <li>Drug: 3BNC117-LS (targeting specific B cell receptors CD4 binding site)</li> </ul>                                                                                                                                                                               | Phase 1 |
| 61 | Completed                | Combination Chemotherapy With or Without Monoclonal Antibody Therapy in Treating Patients With Previously Untreated HIV-Associated Non-Hodgkin's Lymphoma | Lymphoma                               | <ul style="list-style-type: none"> <li>Biological: filgrastim</li> <li>Biological: rituximab targeting CD20</li> <li>Drug: CHOP regimen</li> <li>(and 4 more...)</li> </ul>                                                                                                                                                                           | Phase 3 |
| 62 | Completed                | A Phase 1, Open Label, Dose-escalation Study of the Safety, Pharmacokinetics and Antiretroviral Activity of 3BNC117                                       | Healthy<br>HIV                         | <ul style="list-style-type: none"> <li>Biological: 1 mg/kg, single dose IV administration of 3BNC117</li> <li>Biological: 3 mg/kg, single dose IV administration of 3BNC117</li> <li>Biological: 10 mg/kg, single dose IV administration of 3BNC117</li> <li>(and 3 more...)</li> </ul> <p>(targeting specific B cell receptors CD4 binding site)</p> | Phase 1 |
| 63 | Withdrawn                | Safety And Efficacy Study Of CP-675,206 In HIV-Infected Patients                                                                                          | Human Immunodeficiency Virus           | <ul style="list-style-type: none"> <li>Drug: CP-675,206 anti-cytotoxic T lymphocyte-associated antigen 4</li> </ul>                                                                                                                                                                                                                                   | Phase 2 |
| 64 | Completed                | High Dose Therapy and Peripheral Blood Stem Cell Transplantation in HIV Related Non Hodgkin Lymphoma (NHL) at High Risk                                   | HIV-related Lymphoma<br>HIV Infections | <ul style="list-style-type: none"> <li>Other: Rituximab targeting CD20 and CHOP regimen + PBSCT</li> </ul>                                                                                                                                                                                                                                            | Phase 2 |
| 65 | Completed                | Combination Therapy With 3BNC117 and 10-1074 in HIV-Infected Individuals                                                                                  | HIV                                    | <ul style="list-style-type: none"> <li>Biological: 3BNC117 (targeting specific B cell receptors CD4 binding site) and 10-1074 (targeting V3 glycan)</li> </ul>                                                                                                                                                                                        | Phase 1 |

|    |                          |                                                                                                                                                                                                                                                    |                              |                                                                                                                                                     |                |
|----|--------------------------|----------------------------------------------------------------------------------------------------------------------------------------------------------------------------------------------------------------------------------------------------|------------------------------|-----------------------------------------------------------------------------------------------------------------------------------------------------|----------------|
|    |                          |                                                                                                                                                                                                                                                    |                              | <ul style="list-style-type: none"> <li>Biological: Normal saline placebo</li> </ul>                                                                 |                |
| 66 | Recruiting               | Role of PLA2G1B During HIV Infection                                                                                                                                                                                                               | HIV Infections               | <ul style="list-style-type: none"> <li>Other: biological sample</li> </ul>                                                                          | Not Applicable |
| 67 | Completed                | A Safety Study Of A Single Vaginal Administration Of P2G12 Antibody In Healthy Female Subjects                                                                                                                                                     | Human Immunodeficiency Virus | <ul style="list-style-type: none"> <li>Drug: P2G12 targeting gp41 MPER</li> </ul>                                                                   | Phase 1        |
| 68 | Completed<br>Has Results | A Research Study to See if a Change in Therapy for HIV Infection Can Improve the Immune Response to Treatment                                                                                                                                      | HIV Infections               | <ul style="list-style-type: none"> <li>Drug: Kaletra + Current Dual NRTI Backbone</li> <li>Drug: Current Regimen</li> </ul>                         | Phase 4        |
| 69 | Withdrawn                | A Trial of Observed Long-acting, Anti-HIV Treatment With a Monoclonal CCR5 Antibody (PRO 140) as an Adjunct to a New, Optimized, Oral Antiretroviral Regimen in HIV-infected Injection Drug Users With Viral Rebound and Documented Poor Adherence | HIV                          | <ul style="list-style-type: none"> <li>Drug: PRO 140 targeting CCR5</li> <li>Drug: Placebo</li> </ul>                                               | Phase 2        |
| 70 | Recruiting               | A Randomised Placebo Controlled Trial of ART Plus Dual Long-acting HIV-specific Broadly Neutralising Antibodies (bNAbs).                                                                                                                           | HIV/AIDS and Infections      | <ul style="list-style-type: none"> <li>Drug: Investigational Medicinal Product</li> </ul>                                                           | Phase 2        |
| 71 | Withdrawn                | PRO 140 for Human Immunodeficiency Virus                                                                                                                                                                                                           | HIV                          | <ul style="list-style-type: none"> <li>Biological: PRO 140 targeting CCR5</li> </ul>                                                                | Phase 2        |
| 72 | Not yet recruiting       | The HIV Functional Cure Potential of UB-421 in ART Stabilized HIV-1 Patients                                                                                                                                                                       | HIV-1-infection              | <ul style="list-style-type: none"> <li>Biological: UB-421(25 mg/kg) Q2W</li> <li>Biological: UB-421(25 mg/kg) Q4W</li> </ul>                        | Phase 2        |
| 73 | Active, not recruiting   | The HIV Functional Cure Potential of UB-421 in ART Stabilized HIV-1 Patients                                                                                                                                                                       | HIV-1 Infection              | CD4-targeting antibody <ul style="list-style-type: none"> <li>Biological: UB-421(25 mg/kg) Q2W</li> <li>Biological: UB-421(25 mg/kg) Q4W</li> </ul> | Phase 2        |
| 74 | Not yet recruiting       | UB-421 Combine With Optimized Background Therapy Regimen in Multi-Drug Resistant HIV-1 Infection Patients                                                                                                                                          | HIV-1 Infection              | CD4-targeting antibody <ul style="list-style-type: none"> <li>Biological: UB-421</li> <li>Drug: Optimized background therapy (OBT)</li> </ul>       | Phase 2        |
| 75 | Completed                | Dose Escalation Safety Study of TMB-365 in HIV-1 Infected Participants                                                                                                                                                                             | HIV-1-infection              | CD4-targeting antibody <ul style="list-style-type: none"> <li>Biological: TMB-365 targeting CD4 receptors</li> </ul>                                | Phase 1        |
| 76 | Active, not recruiting   | A Pilot Trial of AVD and Brentuximab Vedotin (SGN-35) in the Treatment of Stage                                                                                                                                                                    | HIV Infection                | <ul style="list-style-type: none"> <li>Drug: brentuximab vedotin a CD30-specific mAbs</li> <li>Drug: Doxorubicin Hydrochloride</li> </ul>           | Phase 2        |

|    |                        |                                                                                                                                                                                                                                 |                                                 |                                                                                                                                                                                                    |                    |
|----|------------------------|---------------------------------------------------------------------------------------------------------------------------------------------------------------------------------------------------------------------------------|-------------------------------------------------|----------------------------------------------------------------------------------------------------------------------------------------------------------------------------------------------------|--------------------|
|    |                        | III-IV HIV-associated Hodgkin Lymphoma                                                                                                                                                                                          | HIV-associated Hodgkin Lymphoma                 | <ul style="list-style-type: none"> <li>• Drug: Vinblastine</li> <li>• Drug: Dacarbazine</li> </ul>                                                                                                 |                    |
|    |                        |                                                                                                                                                                                                                                 | Stage III Adult Hodgkin Lymphoma                |                                                                                                                                                                                                    |                    |
|    |                        |                                                                                                                                                                                                                                 | Stage IV Adult Hodgkin Lymphoma                 |                                                                                                                                                                                                    |                    |
| 77 | Recruiting             | Effect of PCSK9 Inhibition on Cardiovascular Risk in Treated HIV Infection (EPIC-HIV Study)                                                                                                                                     | Dyslipidemias                                   | <ul style="list-style-type: none"> <li>• Drug: Alirocumab (PCSK9 inhibitory mAb)</li> </ul>                                                                                                        | Phase 3            |
|    |                        |                                                                                                                                                                                                                                 | Cardiovascular Diseases                         | <ul style="list-style-type: none"> <li>• Other: Placebo</li> </ul>                                                                                                                                 |                    |
|    |                        |                                                                                                                                                                                                                                 | HIV Infections                                  |                                                                                                                                                                                                    |                    |
| 78 | Recruiting             | Albuvirtide and 3BNC117 as Long-Acting Maintenance Therapy in Virologically Suppressed Subjects                                                                                                                                 | HIV-1-infection                                 | <ul style="list-style-type: none"> <li>• Drug: Albuvirtide targeting gp41</li> <li>• Drug: 3BNC117 (targeting specific B cell receptors CD4 binding site)</li> <li>• Drug: Baseline ART</li> </ul> | Phase 2            |
| 79 | Recruiting             | Testing the Combination of the Anti-cancer Drugs XL184 (Cabozantinib) and Nivolumab in Patients With Advanced Cancer and HIV                                                                                                    | Advanced Differentiated Thyroid Gland Carcinoma | <ul style="list-style-type: none"> <li>• Drug: Cabozantinib S-malate</li> <li>• Biological: Nivolumab (PD1-checkpoint inhibitor)</li> </ul>                                                        | Phase 1            |
|    |                        |                                                                                                                                                                                                                                 | Advanced Head and Neck Carcinoma                |                                                                                                                                                                                                    |                    |
|    |                        |                                                                                                                                                                                                                                 | Advanced Hepatocellular Carcinoma               |                                                                                                                                                                                                    |                    |
|    |                        |                                                                                                                                                                                                                                 | (and 100 more...)                               |                                                                                                                                                                                                    |                    |
| 80 | Withdrawn              | the Study to Evaluate the Safety of UB-421 in Combination With Antiretroviral Therapy (ART) and the Efficacy in Reduction of HIV Viral Load and Proviral DNA as Compared to ART Alone in ART-experienced Viremic HIV-1 Patients | HIV-1 Infection                                 | <ul style="list-style-type: none"> <li>• Biological: UB-421 (CD4-targeting antibody)</li> <li>• Other: Antiretroviral Therapy (ART)</li> </ul>                                                     | Phase 2            |
| 81 | Recruiting             | Inducing Immune Quiescence the Genital Tract With ASA                                                                                                                                                                           | Hiv                                             | <ul style="list-style-type: none"> <li>• Drug: ASA 81mg</li> <li>• Other: Control Group</li> <li>• Drug: ASA 325mg</li> </ul>                                                                      | Not Applicable     |
| 82 | Recruiting             | Nivolumab and Ipilimumab in Treating Patients With HIV Associated Relapsed or Refractory Classical Hodgkin Lymphoma or Solid Tumors That Are Metastatic or Cannot Be Removed by Surgery                                         | Advanced Malignant Solid Neoplasm               | <ul style="list-style-type: none"> <li>• Biological: Ipilimumab inhibits CTLA4</li> </ul>                                                                                                          | Phase 1            |
|    |                        |                                                                                                                                                                                                                                 | Anal Carcinoma                                  | <ul style="list-style-type: none"> <li>• Biological: Nivolumab (PD1-checkpoint inhibitor)</li> </ul>                                                                                               |                    |
|    |                        |                                                                                                                                                                                                                                 | HIV Infection                                   |                                                                                                                                                                                                    |                    |
|    |                        |                                                                                                                                                                                                                                 | (and 6 more...)                                 |                                                                                                                                                                                                    |                    |
| 83 | Active, not recruiting | Brentuximab Vedotin and Combination Chemotherapy in Treating Patients With Stage II-IV HIV-Associated Hodgkin Lymphoma                                                                                                          | AIDS-Related Hodgkin Lymphoma                   | <ul style="list-style-type: none"> <li>• Drug: Brentuximab Vedotin a CD30-specific mAbs</li> </ul>                                                                                                 | Phase 1<br>Phase 2 |
|    |                        |                                                                                                                                                                                                                                 | Ann Arbor Stage II Hodgkin Lymphoma             | <ul style="list-style-type: none"> <li>• Drug: Dacarbazine</li> <li>• Drug: Doxorubicin Hydrochloride</li> </ul>                                                                                   |                    |

|    |                                       |                                                                                                                                                                             |                                                                                                                                          |                                                                                                                                                                                      |                    |
|----|---------------------------------------|-----------------------------------------------------------------------------------------------------------------------------------------------------------------------------|------------------------------------------------------------------------------------------------------------------------------------------|--------------------------------------------------------------------------------------------------------------------------------------------------------------------------------------|--------------------|
|    |                                       |                                                                                                                                                                             | Ann Arbor Stage IIA<br>Hodgkin Lymphoma                                                                                                  | <ul style="list-style-type: none"> <li>(and 2 more...)</li> </ul>                                                                                                                    |                    |
|    |                                       |                                                                                                                                                                             | (and 9 more...)                                                                                                                          |                                                                                                                                                                                      |                    |
| 84 | Recruiting                            | Study of the Safety of Trogarzo™ Administered as an Undiluted "IV Push" or an Intramuscular Injection                                                                       | HIV-1-infection                                                                                                                          | <ul style="list-style-type: none"> <li>Drug: ibalizumab-uiyk (CD4-targeting antibody)</li> </ul>                                                                                     | Phase 3            |
| 85 | Active, not recruiting<br>Has Results | Vorinostat and Combination Chemotherapy With Rituximab in Treating Patients With HIV-Related Diffuse Large B-Cell Non-Hodgkin Lymphoma or Other Aggressive B-Cell Lymphomas | AIDS-Related Plasmablastic Lymphoma<br><br>AIDS-Related Primary Effusion Lymphoma<br><br>Ann Arbor Stage I Diffuse Large B-Cell Lymphoma | <ul style="list-style-type: none"> <li>Drug: Cyclophosphamide</li> <li>Drug: Doxorubicin Hydrochloride</li> <li>Drug: Etoposide</li> <li>(and 6 more...)</li> </ul> targeting CD20   | Phase 1<br>Phase 2 |
|    |                                       |                                                                                                                                                                             | (and 13 more...)                                                                                                                         |                                                                                                                                                                                      |                    |
| 86 | Not yet recruiting                    | Safety, Immunogenicity, Efficacy of Ad26.Mos4.HIV, MVA-BN-HIV and PGT121, PGDM1400, and VRC07-523LS in HIV-1-Infected Adults                                                | HIV<br><br>Acquired Immunodeficiency Syndrome<br><br>Immunologic Deficiency Syndrome, Acquired                                           | <ul style="list-style-type: none"> <li>Biological: Ad26.Mos4.HIV</li> <li>Biological: MVA-BN-HIV</li> <li>Biological: PGT121 targeting V3-glycan</li> <li>(and 2 more...)</li> </ul> | Phase 1<br>Phase 2 |
|    |                                       |                                                                                                                                                                             | (and 2 more...)                                                                                                                          |                                                                                                                                                                                      |                    |
| 87 | Recruiting                            | Testing the Addition of an Experimental Medication MK-3475 (Pembrolizumab) to Usual Anti-Retroviral Medications in Patients With HIV and Cancer                             | AIDS-Related Non-Hodgkin Lymphoma<br><br>Classic Hodgkin Lymphoma<br><br>Clinical Stage III Cutaneous Melanoma AJCC v8                   | <ul style="list-style-type: none"> <li>Other: Laboratory Biomarker Analysis</li> <li>Biological: Pembrolizumab (PD-1 inhibitor)</li> </ul>                                           | Phase 1            |
|    |                                       |                                                                                                                                                                             | (and 27 more...)                                                                                                                         |                                                                                                                                                                                      |                    |
| 88 | Recruiting                            | Therapy Adapted for High Risk and Low Risk HIV-Associated Anal Cancer                                                                                                       | AIDS-Related Anal Carcinoma<br><br>Anal Basaloid Carcinoma<br><br>Anal Canal Cloacogenic Carcinoma                                       | <ul style="list-style-type: none"> <li>Drug: Capecitabine</li> <li>Drug: Fluorouracil</li> <li>Radiation: Intensity-Modulated Radiation Therapy</li> <li>(and 2 more...)</li> </ul>  | Phase 2            |
|    |                                       |                                                                                                                                                                             | (and 20 more...)                                                                                                                         |                                                                                                                                                                                      |                    |
| 89 | Completed<br>Has Results              | Combination Chemotherapy and Rituximab in Treating Patients With HIV-Associated Stage I, Stage II, Stage III, or Stage IV Non-Hodgkin's Lymphoma                            | AIDS-related Diffuse Large Cell Lymphoma<br><br>AIDS-related Immunoblastic Large Cell Lymphoma                                           | <ul style="list-style-type: none"> <li>Biological: rituximab targeting CD20</li> <li>Drug: etoposide</li> <li>Drug: doxorubicin hydrochloride</li> <li>(and 4 more...)</li> </ul>    | Phase 2            |

|    |                          |                                                                                                                                                                                                     |                                                         |                                                                                                                                                                                                                   |         |
|----|--------------------------|-----------------------------------------------------------------------------------------------------------------------------------------------------------------------------------------------------|---------------------------------------------------------|-------------------------------------------------------------------------------------------------------------------------------------------------------------------------------------------------------------------|---------|
|    |                          |                                                                                                                                                                                                     | AIDS-related<br>Peripheral/Systemic<br>Lymphoma         |                                                                                                                                                                                                                   |         |
|    |                          |                                                                                                                                                                                                     | AIDS-related Small<br>Noncleaved Cell<br>Lymphoma       |                                                                                                                                                                                                                   |         |
| 90 | Completed                | Safety and Immune Response of BMS-936559 in HIV-Infected People Taking Combination Antiretroviral Therapy                                                                                           | HIV Infections                                          | <ul style="list-style-type: none"> <li>Drug: BMS-936559 anti PDL-1</li> <li>Drug: Placebo for BMS-936559</li> </ul>                                                                                               | Phase 1 |
| 91 | Completed                | Home Treatment of HIV-Infected Patients With Interleukin-2 With or Without a Tumor Necrosis Factor Antagonist                                                                                       | Acquired Immunodeficiency Syndrome<br><br>HIV Infection | <ul style="list-style-type: none"> <li>Drug: IL-2 plus Anti-TNF or Thalidomide</li> </ul>                                                                                                                         | Phase 2 |
| 92 | Recruiting<br>New        | A Clinical Trial to Evaluate the Safety, Tolerability, and Pharmacokinetics of PGDM1400LS Alone and in Combination With VRC07-523LS and PGT121.414.LS in Healthy, HIV-uninfected Adult Participants | HIV Infections                                          | <ul style="list-style-type: none"> <li>Drug: PGDM1400LS (5mg/kg, IV)</li> <li>Drug: PGDM1400LS (20mg/kg, IV)</li> <li>Drug: PGDM1400LS (20mg/kg, SC)</li> <li>(and 14 more...)</li> </ul>                         | Phase 1 |
| 93 | Recruiting               | Evaluating the Safety and Immunogenicity of EnvSeq-1 and CH505 M5 gp120 Envs Adjuvanted With GLA-SE in Healthy, HIV-Uninfected Adults                                                               | HIV Infections                                          | <p>Targeting V1-V2 glycan</p> <ul style="list-style-type: none"> <li>Biological: CH505TF</li> <li>Biological: CH505w53</li> <li>Biological: CH505w78</li> <li>M5 gp120 Envs</li> <li>(and 3 more...)</li> </ul>   | Phase 1 |
| 94 | Unknown<br>†             | Rituximab Plus Combination Chemotherapy in Treating Patients With HIV-Related Non-Hodgkin's Lymphoma                                                                                                | Lymphoma                                                | <p>M5 gp120 Envs</p> <ul style="list-style-type: none"> <li>Biological: bleomycin sulfate</li> <li>Biological: rituximab targeting CD20</li> <li>Drug: prednisolone</li> <li>Drug: vincristine sulfate</li> </ul> | Phase 1 |
| 95 | Completed<br>Has Results | Rituximab and Combination Chemotherapy in Treating Patients With Newly Diagnosed, HIV-Associated Burkitt's Lymphoma                                                                                 | Lymphoma                                                | <ul style="list-style-type: none"> <li>Biological: filgrastim</li> <li>Biological: pegfilgrastim</li> <li>Biological: rituximab targeting CD20</li> <li>(and 10 more...)</li> </ul>                               | Phase 2 |
| 96 | Completed<br>Has Results | Combined Modality Therapy for Patients With With HIV and Stage I, Stage II, or Stage III Anal Cancer                                                                                                | Anal Cancer                                             | <ul style="list-style-type: none"> <li>Biological: cetuximab targeting PD-L1</li> <li>Drug: cisplatin</li> <li>Drug: fluorouracil</li> <li>Radiation: radiation therapy</li> </ul>                                | Phase 2 |
| 97 | Active, not recruiting   | VRC 603: A Phase I, Dose-Escalation Study of the Safety of AAV8-VRC07 (VRC-HIVA070-00-GT) Recombinant AAV Vector                                                                                    | HIV-1 Infected Adults With Controlled Viremia           | <ul style="list-style-type: none"> <li>Genetic: VRC-HIVA070-00-GT (AAV8-VRC07)</li> </ul>                                                                                                                         | Phase 1 |

Expressing VRC07 HIV-1 Neutralizing Antibody in Antiretroviral -Treated, HIV-1 Infected Adults With Controlled Viremia.

(targeting specific B cell receptors CD4 binding site)

|     |                           |                                                                                                                                                                                                     |                                                                                                                                                                                                |                                                                                                                                                                                                                               |         |
|-----|---------------------------|-----------------------------------------------------------------------------------------------------------------------------------------------------------------------------------------------------|------------------------------------------------------------------------------------------------------------------------------------------------------------------------------------------------|-------------------------------------------------------------------------------------------------------------------------------------------------------------------------------------------------------------------------------|---------|
| 98  | Terminated                | Rituximab in the Treatment of HIV Associated Multicentric Castleman Disease Dependent on Chemotherapy                                                                                               | HIV Infections<br><br>Giant Lymph Node Hyperplasia                                                                                                                                             | <ul style="list-style-type: none"> <li>Drug: Rituximab targeting CD20</li> </ul>                                                                                                                                              | Phase 2 |
| 99  | Terminated<br>Has Results | Bococizumab HIV Evaluation (B-HIVE) Study                                                                                                                                                           | Dyslipidemia<br><br>Cardiovascular Disease                                                                                                                                                     | <ul style="list-style-type: none"> <li>Drug: Bococizumab targeting PCSK9</li> <li>Drug: Placebo</li> </ul>                                                                                                                    | Phase 3 |
| 100 | Completed                 | Safety Study of Ibalizumab Subcutaneous Injection in Healthy Volunteers                                                                                                                             | Prevention of Infection With HIV-1                                                                                                                                                             | <ul style="list-style-type: none"> <li>Biological: ibalizumab targeting CD4 receptor (biologic/MAb) for SC Injection or placebo</li> </ul>                                                                                    | Phase 1 |
| 101 | Completed                 | Immunogenicity and Safety of Trivalent Influenza Vaccine in Non-pregnant HIV-infected Women                                                                                                         | Influenza<br><br>Human Immunodeficiency Virus                                                                                                                                                  | <ul style="list-style-type: none"> <li>Biological: Trivalent Inactivated Influenza Vaccine</li> </ul>                                                                                                                         | Phase 4 |
| 102 | Completed                 | Once a Day Use of Lactobacillus Casei Shirota on HIV-infected Patients Infected Patients                                                                                                            | HIV                                                                                                                                                                                            | <ul style="list-style-type: none"> <li>Dietary Supplement: Fermented Milk Drink Yakult 40</li> </ul>                                                                                                                          | Phase 2 |
| 103 | Recruiting                | Ibrutinib, Rituximab, Etoposide, Prednisone, Vincristine Sulfate, Cyclophosphamide, and Doxorubicin Hydrochloride in Treating Patients With HIV-Positive Stage II-IV Diffuse Large B-Cell Lymphomas | AIDS-Related Lymphoma<br><br>Ann Arbor Stage II Diffuse Large B-Cell Lymphoma<br><br>Ann Arbor Stage III Diffuse Large B-Cell Lymphoma<br><br>Ann Arbor Stage IV Diffuse Large B-Cell Lymphoma | <ul style="list-style-type: none"> <li>Drug: Cyclophosphamide</li> <li>Drug: Doxorubicin Hydrochloride</li> <li>Drug: Etoposide</li> <li>(and 8 more...)</li> </ul>                                                           | Phase 1 |
| 104 | Terminated<br>Has Results | Phase I Study to Evaluate a Human Monoclonal Antibody (MAb) 10E8VLS Administered Alone or Concurrently With MAb VRC07-523LS Via Subcutaneous Injection in Healthy Adults                            | Healthy Adult Immune Response                                                                                                                                                                  | <ul style="list-style-type: none"> <li>Biological: VRC-HIVMAB095-00-AB (10E8VLS) targeting gp41 MPER</li> <li>Biological: VRC-HIVMAB075-00-AB (VRC07-523LS) (targeting specific B cell receptors CD4 binding site)</li> </ul> | Phase 1 |
| 105 | Completed                 | Comparison of Two Methods in the Treatment of Cytomegalovirus of the Eyes in Patients With AIDS                                                                                                     | Cytomegalovirus Retinitis<br><br>HIV Infections                                                                                                                                                | <ul style="list-style-type: none"> <li>Drug: Sevimumab CCR5 targeting mAb</li> <li>Drug: Foscarnet sodium</li> <li>Drug: Ganciclovir</li> </ul>                                                                               | Phase 2 |
| 106 | Completed                 | Combination Chemotherapy With or Without Oregovomab Followed by Stereotactic Body Radiation Therapy and                                                                                             | Pancreatic Adenocarcinoma                                                                                                                                                                      | <ul style="list-style-type: none"> <li>Procedure: 4-Dimensional Computed Tomography</li> <li>Drug: Fluorouracil</li> </ul>                                                                                                    | Phase 2 |

|     |                        |                                                                                                                                                                                                                                                                                                              |                                                                                         |                                                                                                                                                                             |         |
|-----|------------------------|--------------------------------------------------------------------------------------------------------------------------------------------------------------------------------------------------------------------------------------------------------------------------------------------------------------|-----------------------------------------------------------------------------------------|-----------------------------------------------------------------------------------------------------------------------------------------------------------------------------|---------|
|     | Has Results            | Nelfinavir Mesylate in Treating Patients With Locally Advanced Pancreatic Cancer                                                                                                                                                                                                                             | Resectable Pancreatic Carcinoma<br><br>Stage I Pancreatic Cancer<br><br>(and 6 more...) | <ul style="list-style-type: none"> <li>Drug: Gemcitabine Hydrochloride</li> <li>(and 6 more...)</li> </ul>                                                                  |         |
| 107 | Completed              | Doxorubicin Hydrochloride Liposome and Rituximab With Combination Chemotherapy in Treating Patients With Newly Diagnosed Burkitt's Lymphoma or Burkitt-Like Lymphoma                                                                                                                                         | Lymphoma                                                                                | <ul style="list-style-type: none"> <li>Drug: Regimen A</li> <li>Drug: Regimen B</li> </ul>                                                                                  | Phase 2 |
| 108 | Completed              | Safety and Efficacy of an Antibody to CCR5 in Individuals With HIV Who Are Not Currently on Antiretroviral Therapy                                                                                                                                                                                           | HIV Infections                                                                          | <ul style="list-style-type: none"> <li>Drug: CCR5mAb004</li> </ul>                                                                                                          | Phase 1 |
| 109 | Completed              | Autologous Peripheral Stem Cell Transplant in Treating Patients With Non-Hodgkin's Lymphoma or Hodgkin's Lymphoma                                                                                                                                                                                            | Lymphoma                                                                                | <ul style="list-style-type: none"> <li>Drug: carmustine</li> <li>Drug: cyclophosphamide</li> <li>Drug: etoposide</li> <li>(and 4 more...)</li> </ul>                        | Phase 2 |
| 110 | Completed              | Immunogenicity and Safety of Trivalent Influenza Vaccine in Pregnant and Nonpregnant HIV Uninfected Women                                                                                                                                                                                                    | Influenza                                                                               | <ul style="list-style-type: none"> <li>Biological: Trivalent Influenza Vaccine</li> </ul>                                                                                   | Phase 4 |
| 111 | Active, not recruiting | A Study of Heterologous Vaccine Regimen of Adenovirus Serotype 26 Mosaic4 Human Immunodeficiency Virus(Ad26.Mos4.HIV), Adjuvanted Clade C gp140 and Mosaic gp140 to Prevent HIV-1 Infection Among Cis-gender Men and Transgender Individuals Who Have Sex With Cis-gender Men and/or Transgender Individuals | Healthy                                                                                 | <ul style="list-style-type: none"> <li>Biological: Ad26.Mos4.HIV</li> <li>Biological: Clade C and Mosaic gp140 HIV bivalent vaccine</li> <li>Biological: Placebo</li> </ul> | Phase 3 |
| 112 | Completed              | Treatment Substitution With PRO 140 Monotherapy in Adult Subjects With HIV-1 Infection                                                                                                                                                                                                                       | HIV<br><br>Human Immunodeficiency Virus                                                 | <ul style="list-style-type: none"> <li>Drug: PRO 140 350mg weekly SQ injection. targeting CCR5</li> </ul>                                                                   | Phase 2 |
| 113 | Active, not recruiting | An Extension of Protocol PRO 140_CD01 TS Study                                                                                                                                                                                                                                                               | HIV<br><br>Human Immunodeficiency Virus                                                 | <ul style="list-style-type: none"> <li>Drug: PRO 140 350mg weekly SQ injection targeting CCR5</li> </ul>                                                                    | Phase 2 |
| 114 | Active, not recruiting | Research In Viral Eradication of HIV Reservoirs                                                                                                                                                                                                                                                              | HIV                                                                                     | <ul style="list-style-type: none"> <li>Drug: Combination Antiretroviral Therapy (cART)</li> <li>Drug: Raltegravir</li> <li>Drug: Vorinostat</li> </ul>                      | Phase 2 |

- (and 2 more...)

|                                                                      |                              |                                                                                                                                                                        |                                                                                        |                                                                                                                                                                                                                                                                                         |                    |
|----------------------------------------------------------------------|------------------------------|------------------------------------------------------------------------------------------------------------------------------------------------------------------------|----------------------------------------------------------------------------------------|-----------------------------------------------------------------------------------------------------------------------------------------------------------------------------------------------------------------------------------------------------------------------------------------|--------------------|
| 11<br>5                                                              | Unknown<br>†                 | Safety and Pharmacokinetics of the Combination Broadly Neutralizing Antibodies, 3BNC117-LS-J and 10-1074-LS-J, in Healthy American and African Adults                  | HIV-1-infection                                                                        | <ul style="list-style-type: none"> <li>• Biological: 3BNC117-LS-J (targeting specific B cell receptors CD4 binding site)</li> <li>• Biological: 10-1074-LS-J targeting V3 glycan</li> <li>• Biological: Combination 3BNC117-LS-J and 10-1074-LS-J</li> <li>• (and 4 more...)</li> </ul> | Phase 1<br>Phase 2 |
| 11<br>6                                                              | Complete<br>d                | Vandetanib and Bevacizumab in Treating Patients With Advanced Solid Tumors or Lymphoma                                                                                 | Lung Cancer<br><br>Lymphoma<br><br>Lymphoproliferative Disorder<br><br>(and 2 more...) | <ul style="list-style-type: none"> <li>• Biological: bevacizumab anti-VEGF monoclonal antibody</li> <li>• Drug: vandetanib</li> <li>• Other: laboratory biomarker analysis</li> <li>• Other: pharmacological study</li> </ul>                                                           | Phase 1            |
| <b>Ebolaviruses</b> a member of Filoviridae (-ssRNA viruses-Group V) |                              |                                                                                                                                                                        |                                                                                        |                                                                                                                                                                                                                                                                                         |                    |
| 1                                                                    | Not yet<br>recruiting        | Prophylaxis Vaccine Antibodies Ebola                                                                                                                                   | Ebola Virus Disease                                                                    | <ul style="list-style-type: none"> <li>• Drug: ansuvimab targeting B cell maturation antigen</li> <li>• Biological: Ervebo targeting The EBOV surface glycoprotein</li> </ul>                                                                                                           | Phase 2            |
| 2                                                                    | Recruiting                   | An Open Study of the Safety and Pharmacokinetics of a Drug for the Emergency Prevention of Ebola Virus Disease                                                         | Ebola Virus Disease                                                                    | <ul style="list-style-type: none"> <li>• Drug: Gamezumab</li> </ul>                                                                                                                                                                                                                     | Phase 1            |
| 3                                                                    | Complete<br>d                | An Open Study of the Safety and Pharmacokinetics of a Medicinal Product for Emergency Prevention of Ebola                                                              | Healthy                                                                                | <ul style="list-style-type: none"> <li>• Biological: GamEMab</li> </ul>                                                                                                                                                                                                                 | Phase 1            |
| 4                                                                    | Complete<br>d                | Study to Evaluate the Immunogenicity and Safety of an Ebola Virus (EBOV) Glycoprotein (GP) Vaccine in Healthy Subjects                                                 | Ebola                                                                                  | <ul style="list-style-type: none"> <li>• Biological: Base Dose EBOV GP Vaccine</li> <li>• Biological: 2x Base Dose EBOV GP Vaccine</li> <li>• Biological: 4x Base Dose EBOV GP Vaccine</li> <li>• (and 3 more...)</li> </ul>                                                            | Phase 1            |
| 5                                                                    | Not yet<br>recruiting<br>New | Pilot Study Evaluating the Impact of Delay Between Administration of Inmazeb Administration and Vaccination by Ervebo on Vaccine Immune Response on Healthy Volunteers | Ebola Virus Disease                                                                    | <ul style="list-style-type: none"> <li>• Biological: Ervebo targeting The EBOV surface glycoprotein</li> <li>• Drug: Inmazeb</li> </ul>                                                                                                                                                 | Phase 2            |
| 6                                                                    | Withdrawn                    | Safety and Pharmacokinetics of a Single ZMapp™ Administration in Healthy Adult Volunteers                                                                              | Healthy                                                                                | <ul style="list-style-type: none"> <li>• Drug: ZMAPP</li> </ul> <p><b>GP-targeting monoclonal antibodies</b></p>                                                                                                                                                                        | Phase 1            |

|   |                                  |                                                                                                                                        |                                           |                                                                                            |         |
|---|----------------------------------|----------------------------------------------------------------------------------------------------------------------------------------|-------------------------------------------|--------------------------------------------------------------------------------------------|---------|
| 7 | <b>Complete d</b><br>Has Results | Safety and Pharmacokinetics of a Human Monoclonal Antibody, VRC-EBOMAB092-00-AB (MAb114), Administered Intravenously to Healthy Adults | Healthy Adult Immune Responses to Vaccine | <ul style="list-style-type: none"> <li>Biological: VRC-EBOMAB092-00-AB (MAb114)</li> </ul> | Phase 1 |
|---|----------------------------------|----------------------------------------------------------------------------------------------------------------------------------------|-------------------------------------------|--------------------------------------------------------------------------------------------|---------|

**GP-targeting monoclonal antibodies**

**Influenza viruses** a member of *Orthomyxoviridae* family (-ssRNA viruses-Group V)

|   |                     |                                                                                                  |                                     |                                                                                                                                                                                                                                                      |         |
|---|---------------------|--------------------------------------------------------------------------------------------------|-------------------------------------|------------------------------------------------------------------------------------------------------------------------------------------------------------------------------------------------------------------------------------------------------|---------|
| 1 | <b>Complete d</b>   | Safety Study of Anti-Influenza Virus Monoclonal Antibody to Treat Influenza                      | Influenza, Human                    | <ul style="list-style-type: none"> <li>Biological: TCN-032 (Anti-M2e mAbs)</li> <li>Biological: Placebo</li> </ul>                                                                                                                                   | Phase 1 |
| 2 | <b>Unknown</b><br>† | Influenza Virus Challenge Study to Test Monoclonal Antibody TCN-032 as a Treatment for Influenza | Influenza                           | <ul style="list-style-type: none"> <li>Biological: TCN-032 (Anti-M2e mAb)</li> <li>Biological: Placebo (saline)</li> </ul>                                                                                                                           | Phase 2 |
| 3 | <b>Complete d</b>   | Assessment of CR8020, a Monoclonal Antibody Against Influenza A Viruses                          | Influenza                           | <ul style="list-style-type: none"> <li>Biological: 2 mg/kg CR8020</li> <li>Biological: 5 mg/kg CR8020</li> <li>Biological: 15 mg/kg CR8020</li> <li>(and 3 more...)</li> </ul> <p>bind the stem region of the HA molecule</p>                        | Phase 1 |
| 4 | <b>Complete d</b>   | Assessment of CR6261, a Monoclonal Antibody Against the Influenza A Virus                        | Influenza                           | <ul style="list-style-type: none"> <li>Biological: CR6261 2 mg/kg</li> <li>Biological: CR6261 5 mg/kg</li> <li>Biological: CR6261 15 mg/kg</li> <li>(and 3 more...)</li> </ul> <p>bind the stem region of the HA molecule</p>                        | Phase 1 |
| 5 | <b>Unknown</b><br>† | Safety and Pharmacokinetics Study of Human Monoclonal Antibody (FGI-101-1A6)                     | Influenza                           | <ul style="list-style-type: none"> <li>Drug: FGI-101-1A6 targeting a universally conserved epitope of TSG-101</li> </ul>                                                                                                                             | Phase 1 |
| 6 | <b>Withdrawn</b>    | Assessment of Efficacy of CR8020 and CR6261, Monoclonal Antibodies, Against Influenza Infection  | Influenza                           | <ul style="list-style-type: none"> <li>Biological: CR8020</li> <li>Biological: CR6261</li> <li>Biological: Placebo</li> </ul> <p>(the epitope is largely distinct from the site recognized by CR6261/F10, and is even lower down on the HA stem)</p> | Phase 2 |
| 7 | <b>Complete d</b>   | Evaluation of Human Immune Responses to Influenza Virus Vaccination in Healthy Volunteers        | Influenza<br>Influenza Immunisation | <ul style="list-style-type: none"> <li>Biological: Influenza Virus Vaccine Inactivated</li> </ul>                                                                                                                                                    | Phase 4 |
| 8 | <b>Complete d</b>   | Evaluation of the Protective Efficacy and Safety of CR8020 in an Influenza Challenge             | Influenza                           | <ul style="list-style-type: none"> <li>Biological: CR8020 (the epitope is largely distinct from the site recognized by CR6261/F10, and is even lower down on the HA stem)</li> <li>Biological: Placebo</li> </ul>                                    | Phase 2 |

|    |                          |                                                                                                                                          |                                                     |                                                                                                                                                                                           |                    |
|----|--------------------------|------------------------------------------------------------------------------------------------------------------------------------------|-----------------------------------------------------|-------------------------------------------------------------------------------------------------------------------------------------------------------------------------------------------|--------------------|
| 9  | Completed                | Immunogenicity and Safety of Trivalent Influenza Vaccine in Non-pregnant HIV-infected Women                                              | Influenza<br><br>Human Immunodeficiency Virus       | <ul style="list-style-type: none"> <li>Biological: Trivalent Inactivated Influenza Vaccine</li> </ul>                                                                                     | Phase 4            |
| 10 | Withdrawn                | Evaluation of the Safety and Efficacy of a Monoclonal Antibody to Treat Influenza                                                        | Influenza                                           | <ul style="list-style-type: none"> <li>Drug: Oseltamivir</li> <li>Biological: MEDI8852 binds a highly conserved influenza A hemagglutinin stalk epitope</li> <li>Drug: Placebo</li> </ul> | Phase 2            |
| 11 | Completed                | A Study of VIS410 to Assess Safety and Pharmacokinetics                                                                                  | Influenza                                           | <ul style="list-style-type: none"> <li>Drug: VIS410 (binds a highly conserved influenza A hemagglutinin stalk epitope)</li> <li>Drug: Placebo</li> </ul>                                  | Phase 1            |
| 12 | Completed<br>Has Results | A Study of MHAA4549A as Monotherapy for Acute Uncomplicated Seasonal Influenza A in Otherwise Healthy Adults                             | Influenza A                                         | <ul style="list-style-type: none"> <li>Drug: MHAA4549A target highly conserved epitope on the stalk of influenza A hemagglutinin</li> <li>Drug: Placebo</li> </ul>                        | Phase 2            |
| 13 | Not yet recruiting       | Impact of Inactivated Trivalent Influenza Vaccine on NSCLC Patients Receiving PD-1 / PD-L1 Inhibitors                                    | Non-Small Cell Lung Cancer<br><br>Influenza Vaccine | <ul style="list-style-type: none"> <li>Drug: PD-1/PD-L1 inhibitors</li> <li>Biological: Inactivated trivalent influenza vaccine</li> </ul>                                                | •                  |
| 14 | Completed<br>Has Results | Efficacy and Safety of CR6261 in an H1N1 Influenza Healthy Volunteer Human Challenge Model                                               | H1N1 Influenza Healthy Volunteers                   | <ul style="list-style-type: none"> <li>Biological: CR6261 V<sub>H</sub>1-69 antibodies bind the stem region of the HA molecule</li> <li>Biological: Placebo</li> </ul>                    | Phase 2            |
| 15 | Completed                | Phase 1 Placebo-controlled, Dose-escalation Study to Evaluate the Safety and Pharmacokinetics of MEDI8852 in Adults                      | Influenza                                           | <ul style="list-style-type: none"> <li>Drug: MEDI8852 binds a highly conserved influenza A hemagglutinin stalk epitope</li> <li>Drug: Placebo</li> </ul>                                  | Phase 1            |
| 16 | Completed<br>Has Results | A Phase 2a to Evaluate the Safety of MEDI8852 in Adults With Uncomplicated Influenza                                                     | Influenza                                           | <ul style="list-style-type: none"> <li>Drug: Oseltamivir</li> <li>Drug: MEDI8852 binds a highly conserved influenza A hemagglutinin stalk epitope</li> <li>Drug: Placebo</li> </ul>       | Phase 1<br>Phase 2 |
| 17 | Withdrawn                | Dose Ranging Study to Evaluate the Efficacy and Safety of MEDI8852 in Adults Who Are Hospitalized With Type A Influenza.                 | Influenza - Type A Strains                          | <ul style="list-style-type: none"> <li>Drug: Oseltamivir</li> <li>Drug: MEDI8852 binds a highly conserved influenza A hemagglutinin stalk epitope</li> <li>Drug: Placebo</li> </ul>       | Phase 2            |
| 18 | Completed                | Evaluation of the Safety and Immunogenicity of a Recombinant Trivalent Nanoparticle Influenza Vaccine With Matrix M-1 Adjuvant (NanoFlu) | Influenza                                           | <ul style="list-style-type: none"> <li>Biological: NanoFlu</li> <li>Biological: Fluzone HD - Day 0</li> <li>Biological: Fluzone HD - Day 21</li> <li>Other: Saline - Day 21</li> </ul>    | Phase 1<br>Phase 2 |

|                                                                          |                              |                                                                                                                                                                                |                                                 |                                                                                                                                                                                                                                                                                                                                                                           |                    |
|--------------------------------------------------------------------------|------------------------------|--------------------------------------------------------------------------------------------------------------------------------------------------------------------------------|-------------------------------------------------|---------------------------------------------------------------------------------------------------------------------------------------------------------------------------------------------------------------------------------------------------------------------------------------------------------------------------------------------------------------------------|--------------------|
| 19                                                                       | Complete<br>d<br>Has Results | Safety and Immunogenicity of Two Doses of a Tetravalent Influenza Vaccine in Adults Aged 18 Years and Above                                                                    | Influenza                                       | <ul style="list-style-type: none"> <li>Biological: MF59-eTIV-H5N1+ placebo /pandemic influenza vaccine</li> <li>Biological: Pandemic influenza vaccine + placebo /MF59-eTIV-H5N1</li> <li>Biological: Pandemic influenza vaccine + seasonal influenza vaccine /pandemic influenza vaccine</li> <li>(and 3 more...)</li> </ul>                                             | Phase 2            |
| 20                                                                       | Complete<br>d<br>Has Results | Safety and Immunogenicity of a Live-attenuated Universal Flu Vaccine Followed by an Inactivated Universal Flu Vaccine                                                          | Influenza Vaccine                               | <ul style="list-style-type: none"> <li>Biological: cH8/1N1 LAIV</li> <li>Biological: AS03-adjuvanted cH5/1N1 IIV</li> <li>Biological: cH5/1N1 IIV</li> <li>(and 3 more...)</li> </ul>                                                                                                                                                                                     | Phase 1            |
| 21                                                                       | Complete<br>d                | Immunogenicity and Safety of Trivalent Influenza Vaccine in Pregnant and Nonpregnant HIV Uninfected Women                                                                      | Influenza                                       | <ul style="list-style-type: none"> <li>Biological: Trivalent Influenza Vaccine</li> </ul>                                                                                                                                                                                                                                                                                 | Phase 4            |
| <b>SARS-CoV-2 virus</b> a member of Retroviridae (+ssRNA virus Group IV) |                              |                                                                                                                                                                                |                                                 |                                                                                                                                                                                                                                                                                                                                                                           |                    |
| 1                                                                        | Recruiting<br>New            | TURN-COVID Biobank: The Dutch Cohort Study for the Evaluation of the Use of Neutralizing Monoclonal Antibodies and Other Antiviral Agents Against SARS-CoV-2                   | COVID-19                                        | <ul style="list-style-type: none"> <li>Drug: casirivimab <b>target the receptor-binding domain of the spike protein of SARS</b> with imdevimab <b>bind to non-overlapping epitopes of the RBD</b></li> <li>Drug: sotrovimab (targets an epitope in the RBD of the spike protein that is conserved between SARS-CoV and SARS-CoV-2)</li> <li>Drug: molnupiravir</li> </ul> | •                  |
| 2                                                                        | Withdrawn                    | A Safety and Efficacy Study of Human Monoclonal Antibodies, BR11-196 and BR11-198 for the Treatment of Patients With COVID-19                                                  | COVID-19                                        | <ul style="list-style-type: none"> <li>Drug: BR11-196 and BR11-198 targets an epitope in the RBD of the spike protein</li> <li>Drug: Placebo</li> </ul>                                                                                                                                                                                                                   | Phase 2            |
| 3                                                                        | Recruiting                   | Tolerability,Safety,Pharmacokinetic Profile and Immunogenicity of a Recombinant Humanized Anti-SARS-CoV-2 Monoclonal Antibody (JS016) for Injection in Chinese Health Subjects | COVID-19; and High Infection Risk of SARS-CoV-2 | <ul style="list-style-type: none"> <li>Combination Product: JS016 (anti-SARS-CoV-2 monoclonal antibody) <i>target</i> the HR1 domain</li> </ul>                                                                                                                                                                                                                           | Phase 1            |
| 4                                                                        | Active, not recruiting       | Study to Evaluate the Safety and Concentrations of Monoclonal Antibody Against Virus That Causes COVID-19 Disease.                                                             | COVID-19 Virus Disease                          | <ul style="list-style-type: none"> <li>Biological: MAD0004J08 targeting the spike protein of SARS-CoV-2</li> <li>Other: Placebo</li> </ul>                                                                                                                                                                                                                                | Phase 1            |
| 5                                                                        | Recruiting                   | JS016 (Anti-SARS-CoV-2 Monoclonal Antibody)With Mild and Moderate COVID-19 or SARS-CoV-2                                                                                       | COVID-19                                        | <ul style="list-style-type: none"> <li>Biological: Recombinant Human Anti-SARS-CoV-2 Monoclonal Antibody(25mg/kg;50mg/kg;100 mg/kg)</li> </ul>                                                                                                                                                                                                                            | Phase 1<br>Phase 2 |

|    |                           |                                                                                                                                                                           |                                           |                                                                                                                                                                                                                                                                                                                                                                     |                    |
|----|---------------------------|---------------------------------------------------------------------------------------------------------------------------------------------------------------------------|-------------------------------------------|---------------------------------------------------------------------------------------------------------------------------------------------------------------------------------------------------------------------------------------------------------------------------------------------------------------------------------------------------------------------|--------------------|
|    |                           | Asymptomatic Infection<br>Subjects                                                                                                                                        |                                           | <ul style="list-style-type: none"> <li>Drug: Placebo</li> </ul>                                                                                                                                                                                                                                                                                                     |                    |
|    |                           |                                                                                                                                                                           |                                           | targeting the spike protein of SARS-CoV-2                                                                                                                                                                                                                                                                                                                           |                    |
| 6  | Recruiting<br>New         | Non-inferiority Trial on Monoclonal Antibodies in COVID-19                                                                                                                | COVID-19                                  | <ul style="list-style-type: none"> <li>Drug: Bamlanivimab Etesevimab that bind to different, but overlapping, epitopes in the spike protein RBD of SARS-CoV-2</li> <li>Drug: Sotrovimab (targets an epitope in the RBD of the spike protein)</li> <li>Drug: Casirivimab-Imdevimab <i>target</i> the receptor-binding domain of the spike protein of SARS</li> </ul> | Phase 3            |
| 7  | Completed                 | COVID-19 : Neutralizing Human Monoclonal Antibodies Against SARS-CoV-2                                                                                                    | COVID                                     | <ul style="list-style-type: none"> <li>Other: Blood sample</li> </ul>                                                                                                                                                                                                                                                                                               | •                  |
| 8  | Recruiting                | Study to Select the Dose and Evaluate Safety and Efficacy of Monoclonal Antibody in Adult With Recently Diagnosed Asymptomatic to Moderately Severe COVID-19.             | Covid19                                   | <ul style="list-style-type: none"> <li>Drug: MAD0004J08 targeting the spike protein of SARS-CoV-2</li> <li>Other: Placebo</li> </ul>                                                                                                                                                                                                                                | Phase 2<br>Phase 3 |
| 9  | Recruiting                | Use of Monoclonal Antibodies for the Treatment of Mild to Moderate COVID-19 in Non-Hospitalized Setting                                                                   | Covid19                                   | <ul style="list-style-type: none"> <li>Biological: BAMLANIVIMAB that bind to different, but overlapping, epitopes in the spike protein RBD of SARS-CoV-2</li> <li>Biological: CASIRIVIMAB</li> <li>Biological: IMDEVIMAB</li> </ul> <p><i>target</i> the receptor-binding domain of the spike protein of SARS</p>                                                   | Phase 2            |
| 10 | Completed                 | A Study of Human Monoclonal Antibodies, BR11-196 and BR11-198                                                                                                             | COVID-19                                  | <ul style="list-style-type: none"> <li>Drug: BR11-196 and BR11-198 (targets an epitope in the RBD of the spike protein)</li> <li>Drug: Placebo</li> </ul>                                                                                                                                                                                                           | Phase 2            |
| 11 | Completed                 | SARS-CoV-2-Neutralizing Monoclonal COVID-19 Antibody DZIF-10c by Infusion                                                                                                 | SARS-CoV-2<br>Infection                   | <ul style="list-style-type: none"> <li>Biological: DZIF-10c binds the receptor-binding domain of the SARS-CoV-2 spike protein</li> <li>Other: Placebo</li> </ul>                                                                                                                                                                                                    | Phase 1<br>Phase 2 |
| 12 | Not yet recruiting<br>New | Pre-exposure Prophylaxis of SARS-CoV-2 Infection (COVID-19) by Monoclonal Antibodies With Early Access Authorization in Immunocompromised Patients. A Prospective Cohort. | COVID-19<br><br>Immunocompromised<br>Host |                                                                                                                                                                                                                                                                                                                                                                     |                    |

|    |                    |                                                                                                                                                                                                                                   |                                                      |                                                                                                                                                                                          |                    |
|----|--------------------|-----------------------------------------------------------------------------------------------------------------------------------------------------------------------------------------------------------------------------------|------------------------------------------------------|------------------------------------------------------------------------------------------------------------------------------------------------------------------------------------------|--------------------|
| 13 | Completed          | SARS-CoV-2-Neutralizing Monoclonal COVID-19 Antibody DZIF-10c by Inhalation                                                                                                                                                       | SARS-CoV-2 Infection                                 | <ul style="list-style-type: none"> <li>Biological: DZIF-10c binds the receptor-binding domain of the SARS-CoV-2 spike protein</li> <li>Drug: Placebo</li> </ul>                          | Phase 1<br>Phase 2 |
| 14 | Recruiting         | Safety, Tolerability, and Efficacy of Anti-Spike (S) SARS-CoV-2 Monoclonal Antibodies for the Treatment of Ambulatory Adult and Pediatric Patients With COVID-19                                                                  | COVID-19                                             | <ul style="list-style-type: none"> <li>Drug: casirivimab+imdevimab combination therapy bind to nonoverlapping epitopes of the spike protein RBD of SARS-CoV-2.</li> </ul>                | Phase 3            |
| 15 | Recruiting         | COVID-19 Administration of Single-Dose Subcutaneous Anti-Spike(s) SARS-CoV-2 Monoclonal Antibodies Casirivimab and Imdevimab in High-Risk Pediatric Participants Under 12 Years of Age                                            | COVID-19                                             | <ul style="list-style-type: none"> <li>Drug: casirivimab+imdevimab bind to nonoverlapping epitopes of the spike protein RBD of SARS-CoV-2.</li> </ul>                                    | Phase 2            |
| 16 | Not yet recruiting | COVID-19 Study of Pharmacokinetics, Safety, Tolerability, and Efficacy of Intravenous Anti-Spike(s) SARS-CoV-2 Monoclonal Antibodies (Casirivimab+Imdevimab) for the Treatment of Pediatric Patients Hospitalized Due to COVID-19 | COVID-19                                             | <ul style="list-style-type: none"> <li>Drug: casirivimab+imdevimab bind to nonoverlapping epitopes of the spike protein RBD of SARS-CoV-2.</li> </ul>                                    | Phase 1            |
| 17 | Completed          | Safety, Tolerability, and Efficacy of Anti-Spike (S) SARS-CoV-2 Monoclonal Antibodies for Hospitalized Adult Patients With COVID-19                                                                                               | COVID-19                                             | <ul style="list-style-type: none"> <li>Drug: REGN10933+REGN10987 combination therapy <i>target</i> different epitopes on the SARS-CoV-2 spike protein.</li> <li>Drug: Placebo</li> </ul> | Phase 1<br>Phase 2 |
| 18 | Completed          | Safety, Tolerability and Pharmacokinetics of SCTA01, an Anti-SARS-CoV-2 Monoclonal Antibody, in Healthy Chinese Subjects                                                                                                          | Coronavirus Disease 2019(COVID-19)                   | <ul style="list-style-type: none"> <li>Biological: SCTA01 target the SARS-CoV-2 spike protein</li> <li>Other: Placebo</li> </ul>                                                         | Phase 1            |
| 19 | Not yet recruiting | Impact of Monoclonal Antibody Treatment on Post-Acute COVID-19 Syndrome                                                                                                                                                           | Post-acute COVID-19 (PACS), or "Long COVID" Syndrome | <ul style="list-style-type: none"> <li>Other: Surveys</li> </ul>                                                                                                                         | •                  |
| 20 | Recruiting         | The Efficacy and Safety of SCTA01 in Hospitalized Patients With Severe COVID-19                                                                                                                                                   | Covid19                                              | <ul style="list-style-type: none"> <li>Drug: SCTA01 target the SARS-CoV-2 spike protein</li> <li>Other: Placebo</li> </ul>                                                               | Phase 2<br>Phase 3 |
| 21 | Recruiting         | Insight Into the UAE Experience With Monoclonal Antibodies (Sotrovimab )                                                                                                                                                          | COVID-19 Respiratory Infection                       |                                                                                                                                                                                          |                    |

|    |                                          |                                                                                                                |                                               |                                                                                                                                                                                                                                                                                                                                                                                                                                                                                                     |         |
|----|------------------------------------------|----------------------------------------------------------------------------------------------------------------|-----------------------------------------------|-----------------------------------------------------------------------------------------------------------------------------------------------------------------------------------------------------------------------------------------------------------------------------------------------------------------------------------------------------------------------------------------------------------------------------------------------------------------------------------------------------|---------|
| 22 | Recruiting                               | A Phase 1 Study of Human Monoclonal Antibodies, BRIL-196 and BRIL-198                                          | COVID-19                                      | <ul style="list-style-type: none"> <li>Drug: BRIL-196 and BRIL-198 targets an epitope in the RBD of the spike protein</li> <li>Drug: Placebo</li> </ul>                                                                                                                                                                                                                                                                                                                                             | Phase 1 |
| 23 | Recruiting                               | Finding Treatments for COVID-19: A Trial of Antiviral Pharmacodynamics in Early Symptomatic COVID-19 (PLATCOV) | COVID-19                                      | <ul style="list-style-type: none"> <li>Drug: Favipiravir</li> <li>Drug: Monoclonal antibodies</li> <li>Drug: Ivermectin inhibits nuclear transport mechanisms mediated by importins</li> <li>(and 2 more...)</li> </ul>                                                                                                                                                                                                                                                                             | Phase 2 |
| 24 | Completed                                | Safety, Tolerability, and Pharmacokinetics Study of Human Monoclonal Antibody BRIL-198                         | COVID-19                                      | <ul style="list-style-type: none"> <li>Drug: BRIL-198 targets an epitope in the RBD of the spike protein</li> <li>Drug: Placebo</li> </ul>                                                                                                                                                                                                                                                                                                                                                          | Phase 1 |
| 25 | Completed                                | Safety, Tolerability, and Pharmacokinetics Study of Human Monoclonal Antibody BRIL-196                         | COVID-19                                      | <ul style="list-style-type: none"> <li>Drug: BRIL-196 targets an epitope in the RBD of the spike protein</li> <li>Drug: Placebo</li> </ul>                                                                                                                                                                                                                                                                                                                                                          | Phase 1 |
| 26 | Completed                                | Study of CPI-006 as Immunotherapy for Hospitalized COVID-19 Patients                                           | COVID-19                                      | <ul style="list-style-type: none"> <li>Drug: CPI-006 an Anti-CD73 Antibody</li> <li>Other: Standard of Care</li> </ul>                                                                                                                                                                                                                                                                                                                                                                              | Phase 1 |
| 27 | No longer available                      | Compassionate Use Open-Label Anti-CD14 Treatment in Patients With SARS-CoV-2 (COVID-19)                        | COVID<br>ARDS, Human<br>Ards<br><br>SARS-CoV2 | <ul style="list-style-type: none"> <li>Biological: IC14, a monoclonal antibody against CD14</li> </ul>                                                                                                                                                                                                                                                                                                                                                                                              | •       |
| 28 | Recruiting                               | UPMC OPTIMISE-C19 Trial, a COVID-19 Study                                                                      | Covid19                                       | <ul style="list-style-type: none"> <li>Biological: Lilly Bamlanivimab</li> <li>Biological: Regeneron Casirivimab + Imdevimab <i>target</i> the receptor-binding domain of the spike protein of SARS</li> <li>Biological: Lilly Bamlanivimab + Etesevimab that bind to different, but overlapping, epitopes in the spike protein RBD of SARS-CoV-2</li> <li>Biological: Sotrovimab (targets an epitope in the RBD of the spike protein that is conserved between SARS-CoV and SARS-CoV-2)</li> </ul> | Phase 3 |
| 29 | Completed<br><a href="#">Has Results</a> | Treatment With CSL312 in Adults With Coronavirus Disease 2019 (COVID-19)                                       | Coronavirus Disease 2019 (COVID-19)           | <ul style="list-style-type: none"> <li>Biological: Garadacimab, Factor XIIa Antagonist Monoclonal Antibody</li> <li>Drug: Placebo</li> </ul>                                                                                                                                                                                                                                                                                                                                                        | Phase 2 |

|    |                              |                                                                                                                                                                                                                                   |                                         |                                                                                                                                                                               |                    |
|----|------------------------------|-----------------------------------------------------------------------------------------------------------------------------------------------------------------------------------------------------------------------------------|-----------------------------------------|-------------------------------------------------------------------------------------------------------------------------------------------------------------------------------|--------------------|
| 30 | Active,<br>not<br>recruiting | Intramuscular VIR-7831 (Sotrovimab) for Mild/Moderate COVID-19                                                                                                                                                                    | Covid19                                 | <ul style="list-style-type: none"> <li>Biological: VIR-7831 (targets an epitope in the RBD of the spike protein that is conserved between SARS-CoV and SARS-CoV-2)</li> </ul> | Phase 3            |
| 31 | Active,<br>not<br>recruiting | Immune Responses to COVID-19; Isolation of Neutralizing Antibodies for Therapeutics and Vaccine.                                                                                                                                  | SARS-CoV 2                              | <ul style="list-style-type: none"> <li>Other: Blood sampling</li> </ul>                                                                                                       | •                  |
| 32 | Recruiting                   | Efficacy and Safety of JS016 in Patients With SARS-CoV-2 Infection (COVID-19)                                                                                                                                                     | COVID-19<br><br>SARS-CoV-2              | <ul style="list-style-type: none"> <li>Drug: JS016 <i>target</i> the HR1 domain</li> </ul>                                                                                    | Phase 2            |
| 33 | Recruiting                   | COVID-19 International Drug Pregnancy Registry                                                                                                                                                                                    | Covid19                                 | <ul style="list-style-type: none"> <li>Drug: Monoclonal antibody</li> </ul>                                                                                                   |                    |
| 34 | Recruiting                   | Use of nMoABs for the Treatment of COVID-19 in Patients With HM.                                                                                                                                                                  | Covid19<br><br>Hematological Malignancy |                                                                                                                                                                               |                    |
| 35 | Completed                    | A Study of Immune System Proteins in Participants With Mild to Moderate COVID-19 Illness                                                                                                                                          | COVID-19                                | <ul style="list-style-type: none"> <li>Drug: LY3819253 anti-spike mAbs</li> <li>Drug: LY3832479 anti-spike mAbs</li> <li>Drug: Placebo</li> <li>(and 2 more...)</li> </ul>    | Phase 2            |
| 36 | Not yet<br>recruiting<br>New | COVID-19 Study Assessing the Safety and Tolerability of Co-Formulated Anti-Spike (S) SARS-CoV-2 Monoclonal Antibodies (Casirivimab+Imdevimab) in Adult Volunteers                                                                 | Healthy<br><br>Chronic Stable Illness   | <ul style="list-style-type: none"> <li>Drug: Casirivimab+Imdevimab <i>target</i> the receptor-binding domain of the spike protein of SARS</li> </ul>                          | Phase 1            |
| 37 | Completed                    | Study Assessing the Safety, Tolerability, Pharmacokinetics, and Immunogenicity of Repeated Subcutaneous Doses of Anti-Spike (S) SARS-CoV-2 Monoclonal Antibodies (REGN10933+REGN10987) in Adult Volunteers as Related to COVID-19 | Healthy<br><br>Chronic Stable Illness   | <ul style="list-style-type: none"> <li>Drug: REGN10933+REGN10987 <i>target</i> different epitopes on the SARS-CoV-2 spike protein.</li> <li>Drug: Placebo</li> </ul>          | Phase 1            |
| 38 | Recruiting                   | A Study to Evaluate Efficacy and Safety of Casirivimab+Imdevimab (Monoclonal Antibodies) for Prevention of COVID-19 in Immunocompromised Adolescents and Adults                                                                   | Immunocompromised                       | <ul style="list-style-type: none"> <li>Drug: casirivimab+imdevimab <i>target</i> the receptor-binding domain of the spike protein of SARS</li> <li>Drug: Placebo</li> </ul>   | Phase 3            |
| 39 | Not yet<br>recruiting        | The Safety and Efficacy of SCTA01 Against COVID-19 in                                                                                                                                                                             | Covid19                                 | <ul style="list-style-type: none"> <li>Biological: SCTA01 <i>target</i> the SARS-CoV-2 spike protein</li> </ul>                                                               | Phase 2<br>Phase 3 |

|    |                        |                                                                                                                                                                                                                                                                           |                                                                                                         |                                                                                                                                                                                                                              |                    |
|----|------------------------|---------------------------------------------------------------------------------------------------------------------------------------------------------------------------------------------------------------------------------------------------------------------------|---------------------------------------------------------------------------------------------------------|------------------------------------------------------------------------------------------------------------------------------------------------------------------------------------------------------------------------------|--------------------|
|    |                        | Patients Admitted to High Dependence or Intensive Care                                                                                                                                                                                                                    |                                                                                                         | <ul style="list-style-type: none"> <li>Biological: SCTA01 Placebo</li> </ul>                                                                                                                                                 |                    |
| 40 | Not yet recruiting     | To Evaluate SCTA01 Treatment of High-risk Outpatients With COVID-19                                                                                                                                                                                                       | COVID-19<br><br>SARS-CoV-2                                                                              | <ul style="list-style-type: none"> <li>Drug: SCTA01 target the SARS-CoV-2 spike protein</li> <li>Other: Placebo</li> </ul>                                                                                                   | Phase 2<br>Phase 3 |
| 41 | Completed              | COVID-19 Study Assessing the Efficacy and Safety of Anti-Spike SARS CoV-2 Monoclonal Antibodies for Prevention of SARS CoV-2 Infection Asymptomatic in Healthy Adults and Adolescents Who Are Household Contacts to an Individual With a Positive SARS-CoV-2 RT-PCR Assay | Healthy Participants                                                                                    | <ul style="list-style-type: none"> <li>Drug: REGN10933 + REGN10987 <i>target</i> different epitopes on the SARS-CoV-2 spike protein.</li> <li>Drug: Placebo</li> </ul>                                                       | Phase 3            |
| 42 | Not yet recruiting     | Study to Evaluate the Safety and Efficacy of a Monoclonal Antibody Cocktail for the Prevention of COVID-19                                                                                                                                                                | COVID-19                                                                                                | <ul style="list-style-type: none"> <li>Drug: ADM03820 incorporating mAbs that target non-overlapping regions of the RBD</li> <li>Other: Placebo</li> </ul>                                                                   | Phase 2<br>Phase 3 |
| 43 | Suspended              | Treatment of Nosocomial COVID-19                                                                                                                                                                                                                                          | Covid19<br><br>Nosocomial Infection<br><br>SARS-CoV2 Infection                                          | <ul style="list-style-type: none"> <li>Drug: Anti-SARS-CoV-2 mAb</li> </ul>                                                                                                                                                  | Phase 4            |
| 44 | Not yet recruiting     | Pharmacokinetics of Sotrovimab as Pre-exposure Prophylaxis for COVID-19 in Hematopoietic Stem Cell Transplant Recipients, COVIDMAB Study                                                                                                                                  | COVID-19 Infection<br><br>Hematopoietic and Lymphoid Cell Neoplasm<br><br>Malignant Solid Neoplasm      | <ul style="list-style-type: none"> <li>Other: Questionnaire Administration</li> <li>Biological: Sotrovimab (targets an epitope in the RBD of the spike protein that is conserved between SARS-CoV and SARS-CoV-2)</li> </ul> | Phase 1            |
| 45 | Recruiting             | COVID-19 and Anti-CD14 Treatment Trial                                                                                                                                                                                                                                    | Coronavirus Disease 2019 (COVID-19)<br><br>Severe Acute Respiratory Syndrome Coronavirus 2 (SARS-CoV-2) | <ul style="list-style-type: none"> <li>Biological: anti-CD14</li> <li>Other: Placebo</li> <li>Drug: remdesivir</li> </ul>                                                                                                    | Phase 2            |
| 46 | No longer available    | COVID-19 Soliris Expanded Access Protocol                                                                                                                                                                                                                                 | Covid19                                                                                                 | <ul style="list-style-type: none"> <li>Biological: Eculizumab targets complement <b>protein C5</b></li> </ul>                                                                                                                | •                  |
| 47 | Recruiting             | Study of TJ003234 (Anti-GM-CSF Monoclonal Antibody) in Subjects With Severe Coronavirus Disease 2019 (COVID-19)                                                                                                                                                           | Coronavirus Disease 2019 COVID-19                                                                       | <ul style="list-style-type: none"> <li>Drug: TJ003234 Anti-GM-CSF Monoclonal Antibody</li> <li>Drug: Placebo</li> </ul>                                                                                                      | Phase 2<br>Phase 3 |
| 48 | Active, not recruiting | Phase III Double-blind, Placebo-controlled Study of AZD7442 for Post- Exposure                                                                                                                                                                                            | COVID-19                                                                                                | <ul style="list-style-type: none"> <li>Drug: AZD7442 <i>target</i> the HR1 domain</li> </ul>                                                                                                                                 | Phase 3            |

|    |                        |                                                                                                                                            |                                               |                                                                                                                                                            |                    |
|----|------------------------|--------------------------------------------------------------------------------------------------------------------------------------------|-----------------------------------------------|------------------------------------------------------------------------------------------------------------------------------------------------------------|--------------------|
|    |                        | Prophylaxis of COVID-19 in Adults                                                                                                          |                                               | <ul style="list-style-type: none"> <li>Drug: Placebo</li> </ul>                                                                                            |                    |
| 49 | Completed              | Efficacy and Safety of hzVSF-v13 in Moderate to Severe Patients With COVID-19 Pneumonia                                                    | COVID-19                                      | <ul style="list-style-type: none"> <li>Drug: hzVSF-v13 humanized virus suppressing factor</li> <li>Drug: Placebo (Normal saline solution)</li> </ul>       | Phase 2            |
| 50 | Active, not recruiting | Phase III Double-blind, Placebo-controlled Study of AZD7442 for Pre-exposure Prophylaxis of COVID-19 in Adult.                             | COVID-19                                      | <ul style="list-style-type: none"> <li>Drug: AZD7442 <i>target</i> the HR1 domain</li> <li>Drug: Placebo</li> </ul>                                        | Phase 3            |
| 51 | Terminated             | Study of the Efficacy and Safety of Intravenous Pamrevlumab, in Hospitalized Participants With Acute COVID-19 Disease                      | COVID-19                                      | <ul style="list-style-type: none"> <li>Drug: Pamrevlumab an anti-connective tissue growth factor</li> <li>Drug: Placebo</li> </ul>                         | Phase 2            |
| 52 | Recruiting             | Efficacy and Safety of hzVSFv13 in Patients With COVID-19 Pneumonia                                                                        | COVID-19                                      | <ul style="list-style-type: none"> <li>Drug: hzVSF-v13 humanized virus suppressing factor</li> <li>Drug: Placebo (Normal saline solution)</li> </ul>       | Phase 2            |
| 53 | Completed              | VIR-7831 for the Early Treatment of COVID-19 in Outpatients                                                                                | Covid19                                       | <ul style="list-style-type: none"> <li>Biological: VIR-7831 anti-spike mAbs</li> <li>Drug: Placebo</li> </ul>                                              | Phase 2<br>Phase 3 |
| 54 | Withdrawn              | A Study to Evaluate Efficacy and Safety of the Combination of SCTA01 & SCTA01C in Outpatients With COVID-19                                | COVID-19                                      | <ul style="list-style-type: none"> <li>Drug: SCTA01 and SCTA01C target the SARS-CoV-2 spike protein</li> <li>Drug: Placebo</li> </ul>                      | Phase 1<br>Phase 2 |
| 55 | Terminated             | Efficacy and Safety of Emapalumab and Anakinra in Reducing Hyperinflammation and Respiratory Distress in Patients With COVID-19 Infection. | SARS-CoV-2                                    | <ul style="list-style-type: none"> <li>Biological: Emapalumab targeting <b>IFN-γ</b></li> <li>Biological: Anakinra</li> </ul>                              | Phase 2<br>Phase 3 |
| 56 | Withdrawn              | Study of TB006 in Outpatient Patients With Mild to Moderate COVID-19                                                                       | Covid19                                       | <ul style="list-style-type: none"> <li>Drug: TB006</li> <li>Other: Placebo</li> </ul>                                                                      | Phase 1            |
| 57 | Recruiting             | Study of Monoclonal Antibody Cocktail Being Tested for the Prevention of COVID-19                                                          | SARS-CoV-2                                    | <ul style="list-style-type: none"> <li>Drug: ADM03820 incorporating mAbs that target non-overlapping regions of the RBD</li> <li>Other: Placebo</li> </ul> | Phase 1            |
| 58 | Active, not recruiting | Phase 3 Study to Evaluate Efficacy and Safety of Lenzilumab in Patients With COVID-19                                                      | Coronavirus Disease 2019 (COVID-19) Pneumonia | <ul style="list-style-type: none"> <li>Biological: Lenzilumab a GM-CSF antagonist</li> <li>Drug: Standard of Care</li> </ul>                               | Phase 3            |
| 59 | Completed              | Acquiring Convalescent Specimens for COVID-19 Antibodies                                                                                   | COVID-19<br><br>Coronavirus Infection         | <ul style="list-style-type: none"> <li>Procedure: Blood draw</li> </ul>                                                                                    | •                  |

| Corona Virus Infection |                        |                                                                                                                                             |                                                                                                          |                                                                                                                                                                     |                                                    |
|------------------------|------------------------|---------------------------------------------------------------------------------------------------------------------------------------------|----------------------------------------------------------------------------------------------------------|---------------------------------------------------------------------------------------------------------------------------------------------------------------------|----------------------------------------------------|
| 60                     | Completed              | Safety of TY027, a Treatment for COVID-19, in Humans                                                                                        | Coronavirus Disease-2019 (COVID-19)                                                                      | <ul style="list-style-type: none"> <li>Biological: TY027 targeting spike protein</li> <li>Other: 0.9% Saline</li> </ul>                                             | Phase 1                                            |
| 61                     | Active, not recruiting | RU Anti-SARS-CoV-2 (COVID-19) mAbs in Healthy Volunteers                                                                                    | Covid19                                                                                                  | <ul style="list-style-type: none"> <li>Biological: C144-LS and C-135-LS antibodies that target the RBD</li> </ul>                                                   | Phase 1                                            |
| 62                     | Completed              | Efficacy and Safety of hzVSF-v13 in Patients With COVID-19 Pneumonia                                                                        | COVID-19                                                                                                 | <ul style="list-style-type: none"> <li>Drug: hzVSF-v13 humanized virus suppressing factor</li> <li>Drug: Placebo (Normal saline solution)</li> </ul>                | Phase 2                                            |
| 63                     | Recruiting             | Monitoring of COVID-19 Vaccine Response in Organ Transplant Patients                                                                        | Covid19<br><br>Kidney Transplantation                                                                    |                                                                                                                                                                     |                                                    |
| 64                     | Not yet recruiting     | Evaluate Safety and Pharmacokinetics of HLX70 in Healthy Adult Volunteers                                                                   | COVID 19                                                                                                 | <ul style="list-style-type: none"> <li>Drug: HLX70 peptides target the HR1 domain</li> <li>Other: Placebo</li> </ul>                                                | Phase 1                                            |
| 65                     | Not yet recruiting     | Immune Response After SARS-CoV-2 Vaccination in a Context of Non-Hodgkin Lymphoma                                                           | Non-hodgkin Lymphoma,B Cell<br><br>Vaccination Failure                                                   | <ul style="list-style-type: none"> <li>Other: Immunological analyses</li> </ul>                                                                                     | Not Applicable                                     |
| 66                     | Not yet recruiting     | Observational Study on the Use of Ivermectin as an Outpatient Treatment Option for COVID-19                                                 | Covid19<br><br>COVID-19 Pneumonia<br><br>COVID-19 Respiratory Infection<br><br>COVID-19 Acute Bronchitis | <ul style="list-style-type: none"> <li>Drug: Ivermectin inhibits nuclear transport mechanisms mediated by importins</li> </ul>                                      | <ul style="list-style-type: none"> <li></li> </ul> |
| 67                     | Recruiting             | Leronlimab in Moderately Ill Patients With COVID-19 Pneumonia                                                                               | COVID-19 Pneumonia                                                                                       | <ul style="list-style-type: none"> <li>Drug: Leronlimab bind CCR5</li> <li>Drug: Placebo</li> </ul>                                                                 | Phase 3                                            |
| 68                     | Recruiting             | Leronlimab in Patients With Coronavirus Disease 2019 (COVID-19) With Need for Mechanical Ventilation or Extracorporeal Membrane Oxygenation | COVID-19 Pneumonia                                                                                       | <ul style="list-style-type: none"> <li>Drug: Leronlimab bind CCR5</li> <li>Drug: Placebo</li> </ul>                                                                 | Phase 3                                            |
| 69                     | Not yet recruiting     | Transplantation of Deceased Donors With COVID-19 Into COVID-19 Negative Recipients Utilizing Casirivimab and Imdevimab Antibody Cocktail    | COVID-19<br><br>Organ Transplant                                                                         | <ul style="list-style-type: none"> <li>Drug: Casirivimab and Imdevimab Antibody Cocktail target the receptor-binding domain of the spike protein of SARS</li> </ul> | Phase 1                                            |
| 70                     | Recruiting             | Efficacy and Safety of TY027, a Treatment for COVID-19, in Humans                                                                           | Coronavirus Disease-2019 (COVID-19)                                                                      | <ul style="list-style-type: none"> <li>Biological: TY027 targeting spike protein</li> <li>Other: 0.9% saline</li> </ul>                                             | Phase 3                                            |

|    |                         |                                                                                                                                                                                                          |                                                                                       |                                                                                                                                                                                                                 |                    |
|----|-------------------------|----------------------------------------------------------------------------------------------------------------------------------------------------------------------------------------------------------|---------------------------------------------------------------------------------------|-----------------------------------------------------------------------------------------------------------------------------------------------------------------------------------------------------------------|--------------------|
| 71 | Complete<br>Has Results | A Study to Assess the Efficacy and Safety of Gimsilumab in Subjects With Lung Injury or Acute Respiratory Distress Syndrome Secondary to COVID-19 (BREATHE)                                              | COVID-19                                                                              | <ul style="list-style-type: none"> <li>Drug: Gimsilumab Anti-GM-CSF monoclonal <i>antibody</i></li> <li>Drug: Placebo</li> </ul>                                                                                | Phase 2            |
| 72 | Recruiting              | Study on the Use of Sarilumab in Patients With COVID-19 Infection                                                                                                                                        | COVID19                                                                               | <ul style="list-style-type: none"> <li>Drug: Sarilumab Prefilled Syringe <i>targeted</i> against the alpha subunit of the IL-6 receptor complex</li> </ul>                                                      | Early Phase 1      |
| 73 | Suspended               | Study of Immune Modulatory Drugs and Other Treatments in COVID-19 Patients: Sarilumab, Azithromycin, Hydroxychloroquine Trial - CORIMUNO-19 - VIRO                                                       | COVID19<br><br>SARS-CoV-2 Infection                                                   | <ul style="list-style-type: none"> <li>Drug: Sarilumab <i>targeted</i> against the alpha subunit of the IL-6 receptor complex</li> <li>Drug: Azithromycin</li> <li>Drug: Hydroxychloroquine</li> </ul>          | Phase 2<br>Phase 3 |
| 74 | Complete<br>d           | Efficacy of Subcutaneous Sarilumab in Hospitalised Patients With Moderate-severe COVID-19 Infection (SARCOVID)                                                                                           | Covid-19                                                                              | <ul style="list-style-type: none"> <li>Drug: Sarilumab <i>targeted</i> against the alpha subunit of the IL-6 receptor complex</li> <li>Other: Standar of care</li> </ul>                                        | Phase 2            |
| 75 | Withdrawn               | Clinical and Immunological Evolution of Covid-19 Occurring in a Context of Non-Hodgkin Lymphoma                                                                                                          | B-cell Lymphoma<br><br>Covid19                                                        |                                                                                                                                                                                                                 |                    |
| 76 | Not yet recruiting      | Exploratory Regimen of Basiliximab for Treatment of Pulmonary Cytokine Storm in SARS-CoV-2 Hospitalized Adult Patients                                                                                   | SARS-CoV-2 Acute Respiratory Disease<br><br>SARS-CoV2 Infection<br><br>Cytokine Storm | <ul style="list-style-type: none"> <li>Drug: Basiliximab Injection <i>targeted</i> against the alpha subunit of the IL-6 receptor complex</li> <li>Drug: Placebo</li> </ul>                                     | Phase 2            |
| 77 | Recruiting              | Bevacizumab in Severe or Critically Severe Patients With COVID-19 Pneumonia-RCT                                                                                                                          | COVID-19 Pneumonia                                                                    | <ul style="list-style-type: none"> <li>Drug: Bevacizumab anti-VEGF monoclonal antibody</li> </ul>                                                                                                               | Not Applicable     |
| 78 | Complete<br>d<br>New    | Study of the Outcomes of Olokizumab Therapy in Hospitalized Patients With SARS-CoV-2 (COVID-19) Infection                                                                                                | COVID-19                                                                              | <ul style="list-style-type: none"> <li>Drug: Olokizumab anti-IL-6 monoclonal <i>antibody</i></li> <li>Drug: Standard therapy</li> </ul>                                                                         | •                  |
| 79 | Terminated              | RAPA-501-Allo Therapy of COVID-19-ARDS                                                                                                                                                                   | Severe COVID-19 Disease                                                               | <ul style="list-style-type: none"> <li>Biological: RAPA-501-Allo off-the-shelf Therapy of COVID-19</li> <li>Other: Placebo</li> </ul>                                                                           | Phase 1<br>Phase 2 |
| 80 | Complete<br>d           | Study to Assess Adverse Events and How Intravenous (IV) ABBV-47D11 and IV ABBV-2B04 Given Alone and in Combination Moves Through the Body of Adult Participants With Coronavirus Disease 2019 (COVID-19) | CoronaVirus Disease-2019 (COVID-19)                                                   | <ul style="list-style-type: none"> <li>Drug: ABBV-47D11 target the S glycoprotein</li> <li>Drug: Placebo for ABBV-47D11</li> <li>Drug: ABBV-2B04 S glycoprotein</li> <li>Drug: Placebo for ABBV-2B04</li> </ul> | Phase 1            |

|    |                        |                                                                                                                          |                                     |                                                                                                                                               |                    |
|----|------------------------|--------------------------------------------------------------------------------------------------------------------------|-------------------------------------|-----------------------------------------------------------------------------------------------------------------------------------------------|--------------------|
| 81 | Completed              | A Study of AK119 (Anti-CD73 Antibody), a Treatment for COVID-19, in Healthy Subjects                                     | Coronavirus Disease 2019 (COVID-19) | <ul style="list-style-type: none"> <li>Drug: AK119 anti CD-73</li> <li>Drug: Placebo</li> </ul>                                               | Phase 1            |
| 82 | Withdrawn              | Study to Evaluate the Safety, Pharmacokinetics and Efficacy of STI-2020 (COVI-AMG™) in Outpatients With COVID-19         | Covid19                             | <ul style="list-style-type: none"> <li>Biological: COVI-AMG targeting IL33 R</li> <li>Drug: Placebo</li> </ul>                                | Phase 1<br>Phase 2 |
| 83 | Not yet recruiting     | Study to Evaluate the Safety and Efficacy of a Single Dose of STI-2020 (COVI-AMG™) to Treat COVID-19                     | Covid19                             | <ul style="list-style-type: none"> <li>Biological: COVI-AMG targeting IL33 R</li> <li>Drug: Placebo</li> </ul>                                | Phase 1<br>Phase 2 |
| 84 | Recruiting             | Study to Evaluate a Single Dose of STI-2020 (COVI-AMG™) in Hospitalized Adults With COVID-19                             | Covid19                             | <ul style="list-style-type: none"> <li>Biological: COVI-AMG targeting IL33 R</li> <li>Drug: Placebo</li> </ul>                                | Phase 2            |
| 85 | Recruiting             | Study to Evaluate a Single Dose of STI-2020 (COVI-AMG™) in Adults With Mild COVID-19 Symptoms                            | Covid19                             | <ul style="list-style-type: none"> <li>Biological: COVI-AMG targeting IL33 R</li> <li>Drug: Placebo</li> </ul>                                | Phase 2            |
| 86 | Not yet recruiting     | Randomized Study to Evaluate Intranasal Dose of STI-2099 (COVI-DROPS™) in Outpatient Adults With Mild COVID-19 Infection | COVID-19                            | <ul style="list-style-type: none"> <li>Biological: COVI-DROPS anti-SARS-CoV-2 spike neutralizing antibodies</li> <li>Drug: Placebo</li> </ul> | Phase 2            |
| 87 | Not yet recruiting     | Study to Evaluate a Single Intranasal Dose of STI-2099 (COVI-DROPS™) in Outpatient Adults With COVID-19 (US)             | Covid19                             | <ul style="list-style-type: none"> <li>Biological: COVI-DROPS anti-SARS-CoV-2 spike neutralizing antibodies</li> <li>Drug: Placebo</li> </ul> | Phase 2            |
| 88 | Completed              | SuPAR in Adult Patients With Covid-19                                                                                    | Covid19                             | <ul style="list-style-type: none"> <li>Diagnostic Test: Soluble Urokinase Plasminogen Activator Receptor</li> </ul>                           | •                  |
| 89 | Recruiting             | Study to Evaluate a Single Intranasal Dose of STI-2099 (COVI-DROPS™) in Outpatient Adults With COVID-19 (UK)             | Covid19                             | <ul style="list-style-type: none"> <li>Biological: COVI-DROPS anti-SARS-CoV-2 spike neutralizing antibodies</li> <li>Drug: Placebo</li> </ul> | Phase 2            |
| 90 | Active, not recruiting | Study to Assess the Safety, Tolerability, and Pharmacokinetics of HFB30132A Against COVID-19 in Healthy Adults           | Healthy                             | <ul style="list-style-type: none"> <li>Drug: HFB30132A <i>target</i> the HR1 domain</li> <li>Other: Placebo</li> </ul>                        | Phase 1            |
| 91 | Not yet recruiting     | Efficiency and Security of NIVOLUMAB Therapy in Obese Individuals With COVID-19 (CORONA Virus Disease) Infection         | Obesity, COVID-19 Infection         | <ul style="list-style-type: none"> <li>Drug: NIVOLUMAB (PD1-checkpoint inhibitor)</li> <li>Other: Routine standard of care</li> </ul>         | Phase 2            |
| 92 | Recruiting             | The Use of Tocilizumab in the Management of Patients Who Have Severe COVID-19 With                                       | Covid19 Pneumonia                   | <ul style="list-style-type: none"> <li>Drug: Tocilizumab <i>anti-IL6 antibody</i></li> </ul>                                                  | Phase 4            |

Suspected Pulmonary  
Hyperinflammation

|     |                         |                                                                                                                                                |                                                                        |                                                                                                                                                                                                                |                    |
|-----|-------------------------|------------------------------------------------------------------------------------------------------------------------------------------------|------------------------------------------------------------------------|----------------------------------------------------------------------------------------------------------------------------------------------------------------------------------------------------------------|--------------------|
| 93  | Complete<br>Has Results | Crizanlizumab for Treating COVID-19 Vasculopathy                                                                                               | COVID-19                                                               | <ul style="list-style-type: none"> <li>Drug: Crizanlizumab targets <b>selectin</b> to reduce the frequency of vasoocclusive crises in patients with sickle cell disease</li> <li>Other: 0.9% saline</li> </ul> | Phase 2            |
| 94  | Recruiting              | Efficacy of Reinforcing Standard Therapy in COVID-19 Patients With Repeated Transfusion of Convalescent Plasma                                 | Covid19                                                                | <ul style="list-style-type: none"> <li>Other: Convalescent Plasma with antibody against SARS-CoV-2.</li> <li>Other: Standard treatment for COVID-19</li> </ul>                                                 | Not Applicable     |
| 95  | Recruiting              | Ravulizumab and COVID-19                                                                                                                       | Covid19<br><br>Thrombotic Microangiopathies<br><br>Acute Kidney Injury | <ul style="list-style-type: none"> <li>Drug: Ravulizumab a long-acting, second-generation C5 inhibitor</li> </ul>                                                                                              | Phase 3            |
| 96  | Recruiting              | Antibodies Production After Covid-19 Vaccination Among Patients With Medical History of Cancer and Anti-CD-20 Treatment                        | Covid19<br><br>Cancer<br><br>HIV Infections                            | <ul style="list-style-type: none"> <li>Diagnostic Test: Laboratory Samples</li> </ul>                                                                                                                          |                    |
| 97  | Recruiting              | Outpatient Treatment With Anti-Coronavirus Immunoglobulin                                                                                      | COVID<br><br>SARS-CoV2 Infection<br><br>Covid19                        | <ul style="list-style-type: none"> <li>Biological: Hyperimmune immunoglobulin to SARS-CoV-2 (hIVIG)</li> <li>Other: Placebo</li> </ul>                                                                         | Phase 3            |
| 98  | Not yet recruiting      | Adrecizumab (HAM8101) to Improve Prognosis and Outcomes in COVID-19 Trial                                                                      | COVID-19                                                               | <ul style="list-style-type: none"> <li>Biological: Adrecizumab (HAM 8101) Anti-Adrenomedullin Antibody</li> <li>Drug: Placebo</li> </ul>                                                                       | Phase 2<br>Phase 3 |
| 99  | Active, not recruiting  | Study of Mavrilimumab (KPL-301) in Participants Hospitalized With Severe Corona Virus Disease 2019 (COVID-19) Pneumonia and Hyper-inflammation | COVID                                                                  | <ul style="list-style-type: none"> <li>Drug: mavrilimumab targeting GM-CSFR-α</li> <li>Other: Placebo</li> </ul>                                                                                               | Phase 2<br>Phase 3 |
| 100 | Withdrawn               | CSL324 in COVID-19                                                                                                                             | Coronavirus Disease 2019 (COVID-19)                                    | <ul style="list-style-type: none"> <li>Biological: CSL324 anti-G-CSFR antibody</li> <li>Drug: Placebo</li> </ul>                                                                                               | Phase 2            |
| 101 | Enrolling by invitation | COVID-19 and Multiple Sclerosis Disease Modifying Therapies                                                                                    | Covid19<br><br>Multiple Sclerosis                                      |                                                                                                                                                                                                                |                    |
| 102 | Recruiting New          | A Safety and Tolerability Study of Sotrovimab (VIR-7831) Prophylaxis Against COVID-19 in Immunocompromised Individuals                         | SARS CoV 2 Infection                                                   | <ul style="list-style-type: none"> <li>Drug: Sotrovimab (targets an epitope in the RBD of the spike protein that is conserved between SARS-CoV and SARS-CoV-2)</li> </ul>                                      | Phase 2            |

|     |                        |                                                                                                                                  |                                                                                                                   |                                                                                                                                                     |         |
|-----|------------------------|----------------------------------------------------------------------------------------------------------------------------------|-------------------------------------------------------------------------------------------------------------------|-----------------------------------------------------------------------------------------------------------------------------------------------------|---------|
| 103 | Active, not recruiting | Randomized, Unicentric, Open, Controlled Clinical Trial, in Phase Iii, to Demonstrate the Effectiveness of Tocilizumab           | COVID-19 Pneumonia                                                                                                | <ul style="list-style-type: none"> <li>Drug: Tocilizumab group <i>anti-IL6 antibody</i></li> <li>Drug: Methylprednisolone group</li> </ul>          | Phase 3 |
| 104 | Recruiting             | Follow-up of Covid-19 Long Term Sequelae                                                                                         | COVID-19 Pneumonia<br><br>COVID-19 Respiratory Infection<br><br>COVID-19 Acute Bronchitis<br><br>(and 15 more...) | <ul style="list-style-type: none"> <li>Other: Not applicable (observational study)</li> </ul>                                                       |         |
| 105 | Not yet recruiting     | Mavrilimumab in Severe COVID-19 Pneumonia and Hyper-inflammation (COMBAT-19)                                                     | Covid-19<br><br>Acute Respiratory Failure<br><br>ARDS, Human<br><br>(and 2 more...)                               | <ul style="list-style-type: none"> <li>Drug: Mavrilimumab targeting GM-CSFR-α</li> <li>Drug: Placebo</li> </ul>                                     | Phase 2 |
| 106 | Completed              | COVID-19 Long-Haulers Study                                                                                                      | Coronavirus Disease 2019                                                                                          | <ul style="list-style-type: none"> <li>Drug: Placebos</li> <li>Drug: Leronlimab (700mg) bind CCR5</li> </ul>                                        | Phase 2 |
| 107 | Withdrawn              | Study to Evaluate STI-1499 (COVI-GUARD) in Patients With Moderate COVID-19                                                       | Covid-19                                                                                                          | <ul style="list-style-type: none"> <li>Biological: COVI-GUARD anti spike protein</li> <li>Other: Standard of Care</li> <li>Drug: Placebo</li> </ul> | Phase 1 |
| 108 | Completed              | Study to Evaluate the Efficacy and Safety of Leronlimab for Mild to Moderate COVID-19                                            | Coronavirus Disease 2019                                                                                          | <ul style="list-style-type: none"> <li>Drug: Placebos</li> <li>Drug: Leronlimab (700mg) bind CCR5</li> </ul>                                        | Phase 2 |
| 109 | Recruiting             | ACTIV-5 / Big Effect Trial (BET-B) for the Treatment of COVID-19                                                                 | COVID-19                                                                                                          | <ul style="list-style-type: none"> <li>Biological: Lenzilumab a GM-CSF antagonist</li> <li>Other: Placebo</li> <li>Drug: Remdesivir</li> </ul>      | Phase 2 |
| 110 | Active, not recruiting | Study to Evaluate the Efficacy and Safety of Leronlimab for Patients With Severe or Critical Coronavirus Disease 2019 (COVID-19) | Coronavirus Disease 2019                                                                                          | <ul style="list-style-type: none"> <li>Drug: Placebos</li> <li>Drug: Leronlimab (700mg) bind CCR5</li> </ul>                                        | Phase 2 |
| 111 | Recruiting             | Convalescent Plasma Therapy for Hospitalized Patients With COVID-19                                                              | COVID-19<br><br>Convalescent Plasma<br><br>SARS-CoV-2<br><br>(and 3 more...)                                      | <ul style="list-style-type: none"> <li>Biological: Convalescent plasma</li> <li>Drug: Standard of care</li> </ul>                                   | Phase 2 |

|         |                                   |                                                                                                                       |                                                                             |                                                                                                                                                                                                      |                       |
|---------|-----------------------------------|-----------------------------------------------------------------------------------------------------------------------|-----------------------------------------------------------------------------|------------------------------------------------------------------------------------------------------------------------------------------------------------------------------------------------------|-----------------------|
| 11<br>2 | Active,<br>not<br>recruiting      | A Study to Assess if a Medicine Called Bamlanivimab is Safe and Effective in Reducing Hospitalization Due to COVID-19 | Covid19                                                                     | <ul style="list-style-type: none"> <li>Biological: Bamlanivimab that bind to different, but overlapping, epitopes in the spike protein RBD of SARS-CoV-2</li> <li>Other: Standard of Care</li> </ul> | Phase 4               |
| 11<br>3 | Not yet<br>recruiting             | Observational Study, Use of Canakinumab Administered Subcutaneously in the Treatment COVID-19 Pneumonia               | COVID-19                                                                    | <ul style="list-style-type: none"> <li>Drug: Canakinumab 150 MG/ML [Ilaris] binds to human IL-1<math>\beta</math> with high affinity</li> </ul>                                                      | •                     |
| 11<br>4 | Complete<br>d                     | ACTIV-5 / Big Effect Trial (BET-A) for the Treatment of COVID-19                                                      | COVID-19                                                                    | <ul style="list-style-type: none"> <li>Other: Placebo</li> <li>Drug: Remdesivir</li> <li>Biological: Risankizumab targeting IL- 23</li> </ul>                                                        | Phase 2               |
| 11<br>5 | Recruiting                        | mulTi-Arm Therapeutic Study in Pre-ICu Patients Admitted With Covid-19 - Repurposed Drugs (TACTIC-R)                  | COVID19                                                                     | <ul style="list-style-type: none"> <li>Drug: Ravulizumab a long-acting, second-generation C5 inhibitor</li> <li></li> <li>Drug: Baricitinib</li> <li>Other: Standard of care</li> </ul>              | Phase 4               |
| 11<br>6 | Recruiting                        | Efficacy of COVID-19 Vaccination in Patientstreated With Anti-CD20 for Follicular Lymphoma or Mantle Cell Lymphoma    | Follicular Lymphoma<br>Mantle Cell Lymphoma                                 | <ul style="list-style-type: none"> <li>Biological: Determination of COVID-19 vacciantion efficacy</li> </ul>                                                                                         | Not<br>Applicabl<br>e |
| 11<br>7 | Recruiting                        | PROSAIC-19 - Prospective Longitudinal Assessment in a COVID-19 Infected Cohort                                        | COVID-19<br><br>SARS-CoV 2<br><br>ARDS, Human<br><br>Immune System Disorder | <ul style="list-style-type: none"> <li>Other: Blood tests sputum, nasal lavage and brushing</li> </ul>                                                                                               | •                     |
| 11<br>8 | Complete<br>d<br>Has Result<br>ts | Canakinumab in Covid-19 Cardiac Injury (The Three C Study)                                                            | COVID-19<br><br>SARS-CoV 2                                                  | <ul style="list-style-type: none"> <li>Drug: Canakinumab Injection 600mg</li> <li>Drug: Canakinumab Injection 300mg</li> <li>Drug: Placebos</li> </ul>                                               | Phase 2               |
| 11<br>9 | Complete<br>d                     | Management of Migraine Using Erenumab and Traditional Therapy at the Time of COVID-19                                 | Migraine Disorders                                                          | <ul style="list-style-type: none"> <li>Drug: Erenumab targeting the CGRP pathway</li> </ul>                                                                                                          | •                     |
| 12<br>0 | Complete<br>d                     | Impact of the Covid-19 on RSV Epidemic                                                                                | RSV Infection                                                               | <ul style="list-style-type: none"> <li>Other: Medical records analysis</li> <li>Other: Comparison of cohorts</li> </ul>                                                                              | •                     |
| 12<br>1 | Recruiting                        | Comparison of Tocilizumab Plus Dexamethasone vs. Dexamethasone for Patients With Covid-19                             | Coronavirus Infection                                                       | <ul style="list-style-type: none"> <li>Drug: Tocilizumab <i>anti-IL6 antibody</i></li> <li>Drug: Dexamethasone</li> </ul>                                                                            | Phase 2               |

SARS (Severe Acute  
Respiratory Syndrome)

Virus Diseases

(and 5 more...)

|         |                              |                                                                                                                                                                                    |                                |                                                                                                                                                                                                                       |                    |
|---------|------------------------------|------------------------------------------------------------------------------------------------------------------------------------------------------------------------------------|--------------------------------|-----------------------------------------------------------------------------------------------------------------------------------------------------------------------------------------------------------------------|--------------------|
| 12<br>2 | Active,<br>not<br>recruiting | Cohort Multiple Randomized<br>Controlled Trials Open-label of<br>Immune Modulatory Drugs<br>and Other Treatments in<br>COVID-19 Patients - Sarilumab<br>Trial - CORIMUNO-19 - SARI | Corona Virus Infection         | <ul style="list-style-type: none"> <li>Drug: Sarilumab <i>targeted</i> against the alpha subunit of the IL-6 receptor complex</li> </ul>                                                                              | Phase 2<br>Phase 3 |
| 12<br>3 | Terminated                   | Anti-il6 Treatment of Serious<br>COVID-19 Disease With<br>Threatening Respiratory<br>Failure                                                                                       | Corona Virus Disease           | <ul style="list-style-type: none"> <li>Drug: RoActemra iv</li> <li>Drug: RoActemra sc</li> <li>Drug: Kevzara sc</li> <li>Other: Standard medical care</li> </ul>                                                      | Phase 2            |
| 12<br>4 | Recruiting                   | Medical Herbs Inhibit<br>Inflammation Directing T Cells<br>to Kill the COVID-19 Virus<br>(COVID)                                                                                   | Covid19 Virus Infection        | <ul style="list-style-type: none"> <li>Dietary Supplement: Inflammation (I)</li> <li>Dietary Supplement: Inflammation (II)</li> <li>Dietary Supplement: Inflammation (III)</li> <li>Drug: Standard of care</li> </ul> | Phase 1<br>Phase 2 |
| 12<br>5 | Completed                    | Study of Multiple Candidate<br>Agents for the Treatment of<br>COVID-19 in Hospitalized<br>Patients                                                                                 | COVID-19                       | <ul style="list-style-type: none"> <li>Drug: Standard of care</li> <li>Drug: Apremilast</li> <li>Drug: Apremilast placebo</li> <li>(and 4 more...)</li> </ul>                                                         | Phase 3            |
| 12<br>6 | Recruiting                   | National Project on Vaccines,<br>COVID-19 and Frail Patients                                                                                                                       | COVID-19                       | <ul style="list-style-type: none"> <li>Biological: COVID-19 vaccines</li> </ul>                                                                                                                                       |                    |
|         |                              |                                                                                                                                                                                    | Solid Tumor                    |                                                                                                                                                                                                                       |                    |
|         |                              |                                                                                                                                                                                    | Hematologic Diseases           |                                                                                                                                                                                                                       |                    |
|         |                              |                                                                                                                                                                                    | (and 2 more...)                |                                                                                                                                                                                                                       |                    |
| 12<br>7 | Not yet<br>recruiting        | Understanding the Long-term<br>Impact of COVID on Children<br>and Families                                                                                                         | SARS-CoV-2<br>Infection        |                                                                                                                                                                                                                       |                    |
| 12<br>8 | Recruiting                   | Severe Asthma Covid Vaccine<br>Response Study                                                                                                                                      | Coronavirus Antibody<br>Levels | <ul style="list-style-type: none"> <li>Other: Not Interventional their treatments are their routine NHS care</li> </ul>                                                                                               |                    |
| 12<br>9 | Active,<br>not<br>recruiting | CORIMUNO-19 - Tocilizumab<br>Trial - TOCI (CORIMUNO-TOCI)                                                                                                                          | Corona Virus Infection         | <ul style="list-style-type: none"> <li>Drug: Tocilizumab <i>anti-IL6 antibody</i></li> </ul>                                                                                                                          | Phase 2            |
| 13<br>0 | Terminated                   | COVID Cohort Study                                                                                                                                                                 | COVID-19                       | <ul style="list-style-type: none"> <li>Other: COVID-19+ observational</li> </ul>                                                                                                                                      | •                  |
|         |                              |                                                                                                                                                                                    | Acute Respiratory<br>Failure   |                                                                                                                                                                                                                       |                    |

|                       |                              |                                                                                                                   |                                                                                                                       |                                                                                                                                                                             |                    |
|-----------------------|------------------------------|-------------------------------------------------------------------------------------------------------------------|-----------------------------------------------------------------------------------------------------------------------|-----------------------------------------------------------------------------------------------------------------------------------------------------------------------------|--------------------|
| 13<br>1               | Active,<br>not<br>recruiting | Characterizing SARS-CoV-2-specific Immunity in Individuals Who Have Recovered From COVID-19                       | SARS-CoV-2<br><br>COVID-19                                                                                            | <ul style="list-style-type: none"> <li>Other: Sample collection</li> </ul>                                                                                                  | •                  |
| 13<br>2               | Recruiting                   | I-SPY COVID-19 TRIAL: An Adaptive Platform Trial for Critically Ill Patients                                      | COVID-19                                                                                                              | <ul style="list-style-type: none"> <li>Drug: Remdesivir</li> <li>Drug: Pulmozyme</li> <li>Drug: IC14 a monoclonal antibody against CD14</li> <li>(and 4 more...)</li> </ul> | Phase 2            |
| 13<br>3               | Recruiting                   | A Study on the Immune-response to COVID-19 Vaccination in Cancer Patients - the IOSI-COVID-19-001 Study           | Covid19<br><br>Cancer                                                                                                 | <ul style="list-style-type: none"> <li>Procedure: Blood sample</li> </ul>                                                                                                   | •                  |
| 13<br>4               | No longer<br>available       | SOLIRIS® (Eculizumab) Treatment of Participants With COVID-19                                                     | COVID-19<br><br>Pneumonia, Viral<br><br>Acute Lung Injury/Acute Respiratory Distress Syndrome (ARDS)                  | <ul style="list-style-type: none"> <li>Biological: eculizumab targets complement <b>protein C5</b></li> </ul>                                                               | •                  |
| 13<br>5               | Terminated                   | Efficacy and Safety Study of IV Ravulizumab in Patients With COVID-19 Severe Pneumonia                            | COVID-19 Severe Pneumonia<br><br>Acute Lung Injury<br><br>Acute Respiratory Distress Syndrome<br><br>Pneumonia, Viral | <ul style="list-style-type: none"> <li>Biological: Ravulizumab a long-acting, second-generation C5 inhibitor</li> <li>Other: Best Supportive Care</li> </ul>                | Phase 3            |
| 13<br>6               | Recruiting                   | Randomised Evaluation of COVID-19 Therapy                                                                         | Severe Acute Respiratory Syndrome                                                                                     | <ul style="list-style-type: none"> <li>Drug: Lopinavir-Ritonavir</li> <li>Drug: Corticosteroid</li> <li>Drug: Hydroxychloroquine</li> <li>(and 13 more...)</li> </ul>       | Phase 2<br>Phase 3 |
| 13<br>7               | Recruiting                   | Quantification of Binding and Neutralizing Antibody Levels in COVID-19 Vaccinated Health Care Workers Over 1 Year | COVID-19 Vaccine<br><br>Corona Virus Infection<br><br>Vaccine Adverse Reaction<br><br>(and 3 more...)                 |                                                                                                                                                                             |                    |
| Human Cytomegalovirus |                              |                                                                                                                   |                                                                                                                       |                                                                                                                                                                             |                    |
| 1                     | Completed                    | Efficacy Study of Human Cytomegalovirus (HCMV) Hyperimmune Globulin to Prevent Congenital HCMV Infection          | Cytomegalovirus Infection                                                                                             | <ul style="list-style-type: none"> <li>Drug: HCMV-specific hyperimmune globulin (Cytotect®)</li> <li>Drug: Isotonic solution of sodium chloride (placebo)</li> </ul>        | Phase 2<br>Phase 3 |
| 2                     | Unknown <sup>†</sup>         | The Link Between Human Cytomegalovirus (HCMV) and Hypertension                                                    | HCMV Infection<br><br>Hypertension                                                                                    | <ul style="list-style-type: none"> <li></li> </ul>                                                                                                                          |                    |

|                                             |                          |                                                                                                                                                          |                                                                                       |                                                                                                                                                                                         |         |
|---------------------------------------------|--------------------------|----------------------------------------------------------------------------------------------------------------------------------------------------------|---------------------------------------------------------------------------------------|-----------------------------------------------------------------------------------------------------------------------------------------------------------------------------------------|---------|
| 3                                           | Completed                | Prospective, Randomized Study for Predicting Human Cytomegalovirus (hCMV) Infection Based on Baseline hCMV Specific T-cell Response in Kidney Transplant | CMV Infection<br><br>Kidney Transplantation                                           | <ul style="list-style-type: none"> <li>Other: BIOMARKER- elispot test</li> </ul>                                                                                                        | Phase 4 |
| 4                                           | Unknown                  | Diaplacental Transfer of Anti-HCMV- and Anti-VZV- immunoglobulin G (IgG) - Antibodies at Premature and Mature Newborns                                   | Materno-fetal Transfer of Anti-HCMV-IgG<br><br>Materno-fetal Transfer of Anti-VZV-IgG | <ul style="list-style-type: none"> <li>Other: Blood samples</li> </ul>                                                                                                                  |         |
| 5                                           | Completed<br>Has Results | Efficacy and Safety Study of CSJ148 in Stem Cell Transplant Patients                                                                                     | HCMV                                                                                  | <ul style="list-style-type: none"> <li>Biological: CSJ148 <i>Target Glycoprotein</i></li> <li>Drug: Placebo</li> </ul>                                                                  | Phase 2 |
| 6                                           | Completed                | Detection of Human Cytomegalovirus in the Saliva                                                                                                         | Cytomegalovirus                                                                       | <ul style="list-style-type: none"> <li></li> </ul>                                                                                                                                      |         |
| 7                                           | Completed<br>Has Results | Study to Evaluate Safety, Tolerability, and Immunogenicity of Candidate Human Cytomegalovirus Vaccine in Healthy Adults                                  | Cytomegalovirus Infections                                                            | <ul style="list-style-type: none"> <li>Drug: VBI-1501A 0.5 µg</li> <li>Drug: VBI-1501A 1.0 µg</li> <li>Drug: VBI-1501A 2.0 µg</li> <li>(and 2 more...)</li> </ul>                       | Phase 1 |
| a vaccine candidate containing a gB antigen |                          |                                                                                                                                                          |                                                                                       |                                                                                                                                                                                         |         |
| 8                                           | Completed                | Epidemiology of Human Cytomegalovirus Excretion in the Saliva of Children Attending Nursery in France                                                    | Healthy Volunteers                                                                    | <ul style="list-style-type: none"> <li></li> </ul>                                                                                                                                      |         |
| 9                                           | Completed                | The Epidemiologic Study of Human Cytomegalovirus (CMV) in Female Students of Xiamen University                                                           | Cytomegalovirus Infections                                                            | <ul style="list-style-type: none"> <li></li> </ul>                                                                                                                                      |         |
| 10                                          | Completed<br>Has Results | Safety and Immunogenicity of the Human Cytomegalovirus (CMV) Vaccine (V160) in Healthy Japanese Men (V160-003)                                           | Cytomegalovirus Infections                                                            | <ul style="list-style-type: none"> <li>Biological: V160 (a live hCMV vaccine)</li> <li>Other: Placebo</li> </ul>                                                                        | Phase 1 |
| 11                                          | Completed<br>Has Results | Safety, Tolerability, and Immunogenicity of the Human Cytomegalovirus Vaccine (V160) in Healthy Adults (V160-001)                                        | Cytomegalovirus Infections                                                            | <ul style="list-style-type: none"> <li>Biological: V160 Low Dose IM</li> <li>Biological: V160 Medium Dose IM</li> <li>Biological: V160 High Dose IM</li> <li>(and 6 more...)</li> </ul> | Phase 1 |
| 12                                          | Completed                | Artesunate in Preemptive Treatment of Human Cytomegalovirus (CMV) in Stem Cell Transplant Recipients                                                     | Cytomegalovirus Infections                                                            | <ul style="list-style-type: none"> <li>Drug: Artesunate</li> </ul>                                                                                                                      | Phase 3 |
| 13                                          | Active, not recruiting   | MK-8228 (Letermovir) in the Prevention of Human Cytomegalovirus (CMV) Infection and Disease in Adult                                                     | Cytomegalovirus Infection                                                             | <ul style="list-style-type: none"> <li>Drug: Letermovir tablet</li> <li>Drug: Letermovir IV</li> </ul>                                                                                  | Phase 3 |

|    |                          | Japanese Kidney Transplant Recipients (MK-8228-042)                                                                                                                                                               | Cytomegalovirus Disease                                                           |                                                                                                                                                                                                  |                |
|----|--------------------------|-------------------------------------------------------------------------------------------------------------------------------------------------------------------------------------------------------------------|-----------------------------------------------------------------------------------|--------------------------------------------------------------------------------------------------------------------------------------------------------------------------------------------------|----------------|
| 14 | Active, not recruiting   | Letermovir Versus Valganciclovir to Prevent Human Cytomegalovirus Disease in Kidney Transplant Recipients (MK-8228-002)                                                                                           | CMV Disease                                                                       | <ul style="list-style-type: none"> <li>• Drug: Letermovir</li> <li>• Drug: Valganciclovir</li> <li>• Drug: Acyclovir (ACV)</li> <li>• (and 3 more...)</li> </ul>                                 | Phase 3        |
| 15 | Unknown <sup>†</sup>     | Epidemiology and Prevention of Congenital HCMV in Immune Mothers. Congenital HCMV Infection Lombardy                                                                                                              | Congenital Cytomegalovirus Infection<br><br>Maternal Cytomegalovirus Infection    | <ul style="list-style-type: none"> <li>• Behavioral: Hygienic recommendations</li> </ul>                                                                                                         | Not Applicable |
| 16 | Completed                | Trial to Evaluate Safety and Immunogenicity of a Vaccine Against HCMV                                                                                                                                             | Cytomegalovirus Infection                                                         | <ul style="list-style-type: none"> <li>• Biological: Low dose HB-101</li> <li>• Biological: Medium dose HB-101</li> <li>• Biological: High dose HB-101</li> <li>• Biological: Placebo</li> </ul> | Phase 1        |
| 17 | Unknown <sup>†</sup>     | The Prevalence Rate of Human Cytomegalovirus (HCMV), Epstein-Barr Virus (EBV) and Human Herpes Virus (HHV-6) in a Saliva of the Patient With Periodontitis                                                        | Cytomegalovirus<br><br>Epstein-Barr Virus Infections<br><br>Herpesvirus Infection | <ul style="list-style-type: none"> <li>•</li> </ul>                                                                                                                                              |                |
| 18 | Completed                | Safety Study of Four Chimera Cytomegalovirus (CMV) Vaccines in Healthy Adult Males 30-50 Years of Age                                                                                                             | Cytomegalovirus                                                                   | <ul style="list-style-type: none"> <li>• Biological: cmv vaccine</li> </ul>                                                                                                                      | Phase 1        |
| 19 | Completed                | Vaccine Therapy in Preventing Cytomegalovirus in Healthy Participants                                                                                                                                             | Nonneoplastic Condition                                                           | <ul style="list-style-type: none"> <li>• Biological: PADRE-CMV fusion peptide vaccine</li> <li>• Biological: tetanus-CMV fusion peptide vaccine</li> <li>• Drug: agatolimod sodium</li> </ul>    | Phase 1        |
| 20 | Completed                | Cytomegalovirus Vaccine in Healthy Participants                                                                                                                                                                   | Precancerous/Nonmalignant Condition                                               | <ul style="list-style-type: none"> <li>• Biological: CMVpp65-A*0201 peptide vaccine</li> </ul>                                                                                                   | Phase 1        |
| 21 | Not yet recruiting       | Letermovir for CMV Prevention After Lung Transplantation                                                                                                                                                          | Lung Transplant<br><br>CMV                                                        | <ul style="list-style-type: none"> <li>• Drug: Letermovir</li> <li>• Drug: Valganciclovir</li> </ul>                                                                                             | Phase 2        |
| 22 | Completed<br>Has Results | Letermovir (MK-8228) Versus Placebo in the Prevention of Clinically-Significant Cytomegalovirus (CMV) Infection in Adult, CMV-Seropositive Allogeneic Hematopoietic Stem Cell Transplant Recipients (MK-8228-001) | Prevention of CMV Infection or Disease                                            | <ul style="list-style-type: none"> <li>• Drug: Letermovir</li> <li>• Drug: Placebo</li> </ul>                                                                                                    | Phase 3        |
| 23 | Suspended                | Cytomegalovirus (CMV) Transmission by Frozen Breast Milk in Preterms                                                                                                                                              | Cytomegalovirus                                                                   | <ul style="list-style-type: none"> <li>•</li> </ul>                                                                                                                                              |                |

|                             |                          |                                                                                                                                                                                      |                                                                                                      |                                                                                                                                                                                                                        |                    |
|-----------------------------|--------------------------|--------------------------------------------------------------------------------------------------------------------------------------------------------------------------------------|------------------------------------------------------------------------------------------------------|------------------------------------------------------------------------------------------------------------------------------------------------------------------------------------------------------------------------|--------------------|
| 24                          | Completed                | Effects of Hormone Therapy on the Immune Systems of Postmenopausal Women With Chronic Infections                                                                                     | Atherosclerosis<br><br>Chlamydia Infections<br><br>Cytomegalovirus Infections<br><br>(and 2 more...) | <ul style="list-style-type: none"> <li>Drug: Estrogen therapy</li> </ul>                                                                                                                                               | Phase 2            |
| 25                          | Completed                | BCG and Plasma Amyloid in Non-Demented Adults                                                                                                                                        | Alzheimer Disease, Late Onset                                                                        | <ul style="list-style-type: none"> <li>Biological: Bacillus of Calmette and Guérin (BCG)</li> </ul>                                                                                                                    | Phase 2            |
| Respiratory Syncytial Virus |                          |                                                                                                                                                                                      |                                                                                                      |                                                                                                                                                                                                                        |                    |
| 1                           | Active, not recruiting   | A Study to Evaluate the Safety of MEDI8897 for the Prevention of Medically Attended Respiratory Syncytial Virus (RSV) Lower Respiratory Tract Infection (LRTI) in High-risk Children | Respiratory Syncytial Virus Infections                                                               | <ul style="list-style-type: none"> <li>Drug: MEDI8897 targets the pre-F antigenic region</li> <li>Drug: Palivizumab targeting the <b>antigenic site II (also called site A) region of the RSV F protein</b></li> </ul> | Phase 2<br>Phase 3 |
| 2                           | Completed                | Utilization and Compliance of Respiratory Syncytial Virus Monoclonal Antibody Therapy                                                                                                | Lower Respiratory Tract Infection<br><br>Respiratory Syncytial Virus Infections                      |                                                                                                                                                                                                                        |                    |
| 3                           | Active, not recruiting   | A Study to Evaluate the Safety and Efficacy of MEDI8897 for the Prevention of Medically Attended RSV LRTI in Healthy Late Preterm and Term Infants                                   | Respiratory Syncytial Virus Infections                                                               | <ul style="list-style-type: none"> <li>Drug: MEDI8897 targets the pre-F antigenic region</li> <li>Drug: Placebo</li> </ul>                                                                                             | Phase 3            |
| 4                           | Completed<br>Has Results | Safety Study of a Monoclonal Antibody to Respiratory Syncytial Virus (RSV) in Children Hospitalized With RSV Infection                                                               | Respiratory Syncytial Virus Prophylaxis                                                              | <ul style="list-style-type: none"> <li>Biological: Motavizumab targeting RSV glycoprotein F</li> <li>Other: Placebo</li> </ul>                                                                                         | Phase 1            |
| 5                           | Recruiting               | Safety, Tolerability, and Pharmacokinetics of RSV Monoclonal Antibody RSM01 in Healthy Adults                                                                                        | RSV Infection                                                                                        | <ul style="list-style-type: none"> <li>Drug: RSM01</li> <li>Other: Placebo</li> </ul>                                                                                                                                  | Phase 1            |
| 6                           | Completed<br>Has Results | Effectiveness of Synagis (Palivizumab) Immunoprophylaxis in Preterm Infants With High Risk of Severe Respiratory Syncytial Virus (RSV) Infection                                     | Respiratory Syncytial Virus Infection                                                                | <ul style="list-style-type: none"> <li>Biological: Synagis (palivizumab), monoclonal antibody for passive immunoprophylaxis against severe RSV disease administered according to usual clinical practice.</li> </ul>   |                    |
| 7                           | Completed<br>Has Results | A Study to Evaluate the Safety and Efficacy of MEDI8897 for the Prevention of Medically Attended RSV LRTI in Healthy Preterm Infants.                                                | Respiratory Syncytial Virus Infections                                                               | <ul style="list-style-type: none"> <li>Drug: MEDI8897 targets the pre-F antigenic region</li> <li>Drug: Placebo</li> </ul>                                                                                             | Phase 2            |
| 8                           | Completed<br>Has Results | Study to Evaluate the Efficacy and Safety of Suptavumab (REGN2222) for the Prevention of Medically Attended RSV (Respiratory                                                         | Respiratory Syncytial Virus Infections                                                               | <ul style="list-style-type: none"> <li>Drug: Suptavumab 30 mg/kg</li> <li>Drug: Placebo Matched to Suptavumab</li> <li>Drug: Suptavumab 30 mg/kg- 1 Dose</li> </ul>                                                    | Phase 3            |

Syncytial Virus) Infection in  
Preterm Infants

- Drug: Suptavumab 30 mg/kg - 2 Doses

respiratory syncytial virus fusion  
protein

|    |                                                      |                                                                                                                                                                                                                                                                            |                                                                                                                                                                                      |                                                                                                                                                                                                                                                                                                                                                                                                                                          |                    |
|----|------------------------------------------------------|----------------------------------------------------------------------------------------------------------------------------------------------------------------------------------------------------------------------------------------------------------------------------|--------------------------------------------------------------------------------------------------------------------------------------------------------------------------------------|------------------------------------------------------------------------------------------------------------------------------------------------------------------------------------------------------------------------------------------------------------------------------------------------------------------------------------------------------------------------------------------------------------------------------------------|--------------------|
| 9  | <b>Complete<br/>d</b><br>Has Results                 | Study of MEDI-524 (Motavizumab) for the Prophylaxis of Serious Respiratory Syncytial Virus (RSV) Disease in High-Risk Children                                                                                                                                             | Respiratory Syncytial Virus Infections                                                                                                                                               | <ul style="list-style-type: none"> <li>• Biological: motavizumab (MEDI-524) targeting RSV glycoprotein F</li> <li>• Biological: palivizumab targeting the <b>antigenic site II (also called site A) region of the RSV F protein</b></li> </ul>                                                                                                                                                                                           | Phase 3            |
| 10 | <b>Complete<br/>d</b>                                | Trial to Evaluate the Safety, Tolerability, and Pharmacokinetics of MEDI-524 in Healthy Adults                                                                                                                                                                             | Respiratory Syncytial Virus Infections                                                                                                                                               | <ul style="list-style-type: none"> <li>• Biological: MEDI-524 (Numax-TM)</li> </ul>                                                                                                                                                                                                                                                                                                                                                      | Phase 1            |
| 11 | <b>Complete<br/>d</b>                                | Open-Label, Dose-Escalation Study of 2 to 5 IM Doses of MEDI-524 at 3 mg/kg or 15 mg/kg; Children to be Followed for 90 Days After Their Last Dose of MEDI-524                                                                                                             | Respiratory Syncytial Virus Infections                                                                                                                                               | <ul style="list-style-type: none"> <li>• Biological: Medi-524</li> </ul>                                                                                                                                                                                                                                                                                                                                                                 | Phase 1<br>Phase 2 |
| 12 | <b>Complete<br/>d</b><br><a href="#">Has Results</a> | Study of Motavizumab (MEDI-524) and Palivizumab Administered Sequentially in the Same Respiratory Syncytial Virus (RSV) Season                                                                                                                                             | <p>Respiratory Syncytial Virus Infections</p> <p>Chronic Lung Disease and &lt;= 24 Months of Age or</p> <p>Premature With Gestational Age &lt;=35 Weeks and &lt;=6 Months of Age</p> | <ul style="list-style-type: none"> <li>• Biological: Motavizumab RSV glycoprotein F, palivizumab targeting the <b>antigenic site II (also called site A) region of the RSV F protein</b></li> <li>• Biological: Palivizumab targeting the <b>antigenic site II (also called site A) region of the RSV F protein</b>, motavizumab targeting RSV glycoprotein F</li> <li>• Biological: Motavizumab targeting RSV glycoprotein F</li> </ul> | Phase 2            |
| 13 | <b>Complete<br/>d</b><br><a href="#">Has Results</a> | A Phase 1 Study to Evaluate the Safety, Tolerability, and Pharmacokinetics of MEDI8897 in Healthy Adults                                                                                                                                                                   | Respiratory Syncytial Virus Infections                                                                                                                                               | <ul style="list-style-type: none"> <li>• Drug: MEDI8897 Intravenous</li> <li>• Drug: Placebo</li> <li>• Drug: MEDI8897 Intramuscular</li> </ul>                                                                                                                                                                                                                                                                                          | Phase 1            |
| 14 | <b>Complete<br/>d</b><br><a href="#">Has Results</a> | A Phase 1b/2a Randomized, Double-Blind, Placebo-controlled, Dose-escalation Study to Evaluate the Safety, Tolerability, and Pharmacokinetics of MEDI8897, a Monoclonal Antibody With an Extended Half-life Against Respiratory Syncytial Virus, in Healthy Preterm Infants | Respiratory Syncytial Virus                                                                                                                                                          | <p>targets the pre-F antigenic region</p> <ul style="list-style-type: none"> <li>• Drug: Placebo</li> <li>• Drug: MEDI8897 10 mg</li> <li>• Drug: MEDI8897 25 mg</li> <li>• Drug: MEDI8897 50 mg</li> </ul> <p>targets the pre-F antigenic region</p>                                                                                                                                                                                    | Phase 1            |
| 15 | <b>Complete<br/>d</b>                                | RSV001 - A New Vaccine to Prevent Severe Viral Chest Infections.                                                                                                                                                                                                           | Respiratory Syncytial Virus Infections                                                                                                                                               | <ul style="list-style-type: none"> <li>• Biological: PanAd3-RSV given intra-nasally (high dose)</li> <li>• Biological: MVA-RSV given by intra-muscular injection (high dose)</li> </ul>                                                                                                                                                                                                                                                  | Phase 1            |

|    |                                           |                                                                                                                                                                                                                 |                                                          |                                                                                                                                                                                                                                 |                |
|----|-------------------------------------------|-----------------------------------------------------------------------------------------------------------------------------------------------------------------------------------------------------------------|----------------------------------------------------------|---------------------------------------------------------------------------------------------------------------------------------------------------------------------------------------------------------------------------------|----------------|
|    |                                           |                                                                                                                                                                                                                 |                                                          | <ul style="list-style-type: none"> <li>Biological: PanAd3-RSV given by intra-muscular injection (high dose)</li> <li>(and 3 more...)</li> </ul>                                                                                 |                |
| 16 | Completed                                 | Impact of the Covid-19 on RSV Epidemic                                                                                                                                                                          | RSV Infection                                            | <ul style="list-style-type: none"> <li>Other: Medical records analysis</li> <li>Other: Comparison of cohorts</li> </ul>                                                                                                         |                |
| 17 | Completed                                 | "Palivizumab Therapy for RSV-bronchiolitis"                                                                                                                                                                     | Respiratory Syncytial Virus-bronchiolitis                | <ul style="list-style-type: none"> <li>Drug: Palivizumab targeting the <b>antigenic site II (also called site A) region of the RSV F protein</b></li> <li>Other: Placebo</li> </ul>                                             | Phase 3        |
| 18 | Completed<br><a href="#">Has Results</a>  | A Study to Assess the Safety and Effectiveness of Palivizumab Administered to Children at High Risk of Severe Respiratory Syncytial Virus (RSV) Infection in the Russian Federation and the Republic of Belarus | Respiratory Syncytial Virus (RSV)                        | <ul style="list-style-type: none"> <li>Drug: Palivizumab targeting the <b>antigenic site II (also called site A) region of the RSV F protein</b></li> </ul>                                                                     | Phase 3        |
| 19 | Completed                                 | MEDI-557 Adult Dosing                                                                                                                                                                                           | Respiratory Syncytial Virus                              | <ul style="list-style-type: none"> <li>Drug: Placebo</li> <li>Drug: MEDI-557 targeting RSV glycoprotein F</li> </ul>                                                                                                            | Phase 1        |
| 20 | Terminated<br><a href="#">Has Results</a> | A Study to Evaluate a Single Intramuscular Dose of Motavizumab to Treat Children With Respiratory Syncytial Virus (RSV) Illness                                                                                 | Participants Less Than 12 Months of Age With RSV Illness | <ul style="list-style-type: none"> <li>Biological: Motavizumab targeting RSV glycoprotein F</li> <li>Other: Placebo</li> </ul>                                                                                                  | Phase 2        |
| 21 | Completed<br><a href="#">Has Results</a>  | A Study to Evaluate a Single Intravenous Dose of Motavizumab for the Treatment of Children Hospitalized With Respiratory Syncytial Virus (RSV) Illness                                                          | RSV Illness in ≤12 Months of Participants                | <ul style="list-style-type: none"> <li>Biological: Motavizumab targeting RSV glycoprotein F</li> <li>Other: Placebo</li> </ul>                                                                                                  | Not Applicable |
| 22 | Recruiting                                | Evaluate the Safety and Efficacy of Nirsevimab in Healthy Preterm and Term Infants in China                                                                                                                     | Lower Respiratory Tract Infection                        | <ul style="list-style-type: none"> <li>Drug: Nirsevimab target F glycoprotein of RSV</li> <li>Drug: Placebo</li> </ul>                                                                                                          | Phase 3        |
| 23 | Completed<br><a href="#">Has Results</a>  | MEDI-524 (Motavizumab) for the Prevention of Respiratory Syncytial Virus (RSV) Disease Among Native American Indian Infants in the Southwestern United States                                                   | Healthy                                                  | <ul style="list-style-type: none"> <li>Biological: Motavizumab targeting RSV glycoprotein F</li> <li>Other: Placebo</li> </ul>                                                                                                  | Phase 3        |
| 24 | Completed<br><a href="#">Has Results</a>  | A Study to Evaluate MEDI-524 In Children With Hemodynamically Significant Congenital Heart Disease                                                                                                              | Congenital Heart Disease                                 | <ul style="list-style-type: none"> <li>Biological: Motavizumab targeting RSV glycoprotein F</li> <li>Biological: Palivizumab targeting the <b>antigenic site II (also called site A) region of the RSV F protein</b></li> </ul> | Phase 2        |

|                                                                                                                                             |                              |                                                                                                                                                                                       |                                                                    |                                                                                                                                                                                                                                                     |                    |
|---------------------------------------------------------------------------------------------------------------------------------------------|------------------------------|---------------------------------------------------------------------------------------------------------------------------------------------------------------------------------------|--------------------------------------------------------------------|-----------------------------------------------------------------------------------------------------------------------------------------------------------------------------------------------------------------------------------------------------|--------------------|
| 25                                                                                                                                          | Complete<br>d                | A Phase I, Randomized, Double-Blind, Single-Dose, Dose Escalation Study to Evaluate the Safety, Tolerability, and Pharmacokinetics of MEDI-557                                        | Healthy                                                            | <ul style="list-style-type: none"> <li>Biological: MEDI-557 targeting RSV glycoprotein F</li> </ul>                                                                                                                                                 | Phase 1            |
| 26                                                                                                                                          | Complete<br>d<br>Has Results | A Study to Evaluate the Safety, Tolerability, and Immunogenicity of Motavizumab (MEDI-524) After Dosing for a Second Season in Children                                               | Motavizumab Administration for a Second Season for RSV Prophylaxis | <ul style="list-style-type: none"> <li>Biological: motavizumab (MEDI-524) targeting RSV glycoprotein F</li> <li>Biological: palivizumab 15 mg/kg targeting the <b>antigenic site II (also called site A) region of the RSV F protein</b></li> </ul> | Phase 1<br>Phase 2 |
| 27                                                                                                                                          | Complete<br>d                | A Phase II Randomized, Double-Blind, Two-Period Cross-Over Study to Evaluate the Pharmacokinetics, Safety and Tolerability of a Liquid Formulation of Palivizumab (MEDI-493, Synagis) | -Unhealthy Children With a History of Prematurity                  | <ul style="list-style-type: none"> <li>Drug: MEDI-493 targeting the <b>antigenic site II (also called site A) region of the RSV F protein</b></li> </ul>                                                                                            | Phase 2            |
| 28                                                                                                                                          | Complete<br>d<br>Has Results | Compliance to Synagis (Palivizumab) Under Daily Pediatrician's Conditions in Premature Infants 33 - 35 wGA                                                                            | Premature Infants                                                  |                                                                                                                                                                                                                                                     |                    |
| <b>(MERS-CoV) Middle East respiratory syndrome-related coronavirus</b> , a member of the genus Betacoronavirus ((+)ssRNA viruses, Group IV) |                              |                                                                                                                                                                                       |                                                                    |                                                                                                                                                                                                                                                     |                    |
| 1                                                                                                                                           | Complete<br>d                | A Safety, Tolerability, Pharmacokinetics and Immunogenicity Trial of Co-administered MERS-CoV Antibodies REGN3048 and REGN3051                                                        | Corona Virus Infection                                             | <ul style="list-style-type: none"> <li>Other: Placebo</li> <li>Biological: REGN3048</li> <li>Biological: REGN3051</li> </ul> <p><i>target the MERS coronavirus (MERS CoV) spike protein</i></p>                                                     | Phase 1            |
